# Supplementary material for: Effect of basal luteinizing hormone/follicle-stimulating hormone ratio on clinical outcome of In Vitro fertilization in patients with polycystic ovarian syndrome: a retrospective cohort study
Source: PeerJ. 2024 Nov 26;12:e18635. doi: 10.7717/peerj.18635 (PMC11606322; doi:10.7717/peerj.18635)
Supplement: Supplemental Information 1 [file peerj-12-18635-s001.xlsx]

## Sheet: sheet
ID	age	weight	height	BMI	Infertility type （1=Primary 0=Secondary）	Infertility duration	basal E2 level	basal FSH level	basal LH level	basal T level	protcol	LH/FSH ratio	Total Gn time	Total Gn dose（IU）	E2 level on trigger day (pg/ml)	EM thickness on trigger-day	Oocytes obtained	MII ovum	2pn Fertilization	Cleavage	Number of embryos transferred	Number of frozen embryos	High-quality embryo number on cleaved stage	High-quality embryo number on blastocysts	HCG value	instrauterine gestational sac	instrauterine fetal heart beat	Delivery pregnancy week	live birth（0=No，1=Yes）	Number of fetuses delivered	Number of boys delivered	Number of girls delivered	Severe OHSS（0=No，1=Yes）
41302	30	58	155	24.1415	0	2	42	4.59	0.84	0.2	agonist	0.183007	8	1275	615.8	9.2	7	6	5	5	1	4	2	2	113	0	0	0	0	0	0	0	0
17441	26.7	19.92	19.92	19.92	0	3	35	2.78	0.573333		agonist	0.206235	9	900	2089	10.7	21	20	17	17	2	10	12	8	392	2	2	39+1	1	1	1		0
23313	33	64	156	26.2985	1	1	34	4.2	1.02667	0.27	agonist	0.244444	8	1350	3112	11.6	9	7	5	5	2	2	3	3	1080	2	2	395	1	1	0	1	0
26744	27	77	160	30.0781	0	4	49	7.95	2.24	0.51	agonist	0.281761	14	2212.5	2836	13.4	20	18	10	10	1	4	3	3	2	0	0	0	0	0	0	0	0
38715	33	72	163	27.0993	0	5	68	7.61	2.21333		agonist	0.290845	13	4350	850	11	12	12	11	11	1	2	6	6	397	1	1	395	1	1	0	1	0
25270	27	50	167	17.9282	1	4	45	6.56	1.97333	0.34	agonist	0.300813	13	1575	2197	10.5	16	13	8	8	1	4	5	5	402	1	0	0	0	0	0	0	0
25950	29	58	168	20.5499	0	4	46	5.42	1.72	0.4	agonist	0.317343	12	2700	2578	12.8	10	9	8	8	1	5	4	4	244	1	1	382	1	1	0	1	0
21178	28.8	40.06	40.06	40.06	0	6	37	4.81	1.58667		agonist	0.329868	13	1950	882	9.4	3	2	2	2	2	0	3	1	758	2	2	36+4	1	2	2		0
23910	31	87	165	31.9559	1	5	31	6.92	2.4	0.35	agonist	0.346821	21	4100	1813	12.7	11	10	7	6	1	5	5	5	3	0	0	0	0	0	0	0	0
40240	29	50	156	20.5457	1	1		6.42	2.34667	0.29	agonist	0.365524	10	1350	2994	7.3	16	16	13	12	1	9	3	2	2	0	0	0	0	0	0	0	0
20667	29.5	19.49	19.49	19.49	0	2	55	4.35	1.64		agonist	0.377011	12	1500	1798	12.5	13	13	8	5	2	2	3	1	1092	2	2	37+1	1	2	1	1	0
34364	32	65	156	26.7094	1	2	39	4.83	1.86667	0.25	agonist	0.386473	14	1950	1656	13.7	13	8	6	6	2	1	2	2	600	2	2	365	1	2	2	0	0
22211	29	60	159	23.7332	1	4	37	4.71	1.84	0.54	agonist	0.390658	10	1350	1778	12	11	11	6	5	2	2	3	1	377	2	2	366	1	2	1	1	0
39630	33	69	152	29.865	1	2	42	3.89	1.52	0.29	agonist	0.390746	12	2475	1879.3	13.7	10	10	9	8	1	1	2	2	147	1	1	363	0	0	0	0	0
22685	24	51	163	19.1953	0	4	47	6.18	2.44		agonist	0.394822	16	2400	2374	13.6	13	11	7	7	2	2	1	0	2	0	0	0	0	0	0	0	0
35170	32	60	158	24.0346	1	7	65	6.41	2.65333	0.24	agonist	0.413937	12	3375	2171	9.3	17	14	13	13	1	3	8	8	134	1	1	384	1	1	1	0	0
22942	35	59	159	23.3377	1	3	42	7.18	3.2	0.51	agonist	0.445682	18	4200	3154	11.7	9	8	7	6	2	1	1	0	230	2	2	382	1	2	1	1	0
22745	29	76	170	26.2976	0	3	38	6.69	3.14667	0.89	agonist	0.470354	15	2512.5	2012	10.4	18	17	14	14	1	10	8	8	2592	1	1	432	1	1	1	0	0
39224	35	60	156	24.6548	1	4	60	4.59	2.17333	0.14	agonist	0.473493	11	1775	2322	11.8	12	12	11	11	2	2	6	6	513	2	2	355	1	2	0	2	0
26710	31	60	156	24.6548	0	6	37	7.79	3.70667	0.38	agonist	0.475824	13	1950	2567	12	19	14	9	9	1	1	5	5	745	1	1	374	1	1	1	0	0
21207	28.6	24.77	24.77	24.77	0	7	55	4.99	2.49333		agonist	0.499666	14	2250	1932	11.1	18	13	12	12	2	4	6	6	750	2	2	35+1	1	2	2	0	0
17291	25.1	23.62	23.62	23.62	0	3	40	6.04	3.06667		agonist	0.507726	18	2700	296	10.6	2	2	2	2	2	0	0	0	156	1	1	39+3	1	1	1		0
24384	32	58	163	21.83	1	2	48	7.74	3.96	0.53	agonist	0.511628	14	1725	3409	7.8	11	10	10	10	2	7	7	5	412	2	2	383	1	1	0	1	0
22524	25	75	158	30.0433	0	3	43	5.15	2.64		agonist	0.512621	14	1737.5	1505	10.4	5	3	3	3	2	1	2	1	653	2	2	416	0	0	0	0	0
25665	26	40	155	16.6493	0	3	50	8.12	4.24	0.58	agonist	0.522167	9	1050	1795	9.6	13	13	12	12	2	3	2	2	1168	2	2	383	0	0	0	0	0
38706	28	81	163	30.4867	0	2		5.35	2.82667	0.19	agonist	0.528349	11	2775	2270	12	15	15	13	12	1	6	5	5	140	1	1	386	1	1	1	0	0
23899	32	52	156	21.3675	0	2	36	4.94	2.61333	0.44	agonist	0.529015	12	1762.5	2317	9.9	12	11	9	8	1	7	5	5	760	1	1	392	1	1	1	0	0
45744	31	65	165	23.8751	0	1	38	7.1	3.76	0.33	agonist	0.529577	18	3262.5	979	11	4	3	3	3	1	1	2	1	2	0	0	0	0	0	0	0	0
18051	31	24.52	24.52	24.52	1	2	70	7.93	4.2		agonist	0.529634	12	1800	1516	12.7	5	5	5	5	2	3	5	0	536	2	2	36+4	1	2	1	1	0
40281	28	58	157	23.5304	0	3	33	5.96	3.16	0.26	agonist	0.530201	10	1500	642	12.7	9	7	5	5	1	2	4	4	506	1	1	395	1	1	1	0	0
39032	28	71	168	25.1559	0	2		7.66	4.13333	0.3	agonist	0.5396	10	2325	3667.2	15.5	26	21	15	14	1	4	2	2	62	0	0	0	0	0	0	0	0
47175	31	71	156	29.1749	1	8	58	5.76	3.13333	0.19	agonist	0.543981	11	2850	2276	9.8	13	12	10	10	1	2	1	1	74	1	0	0	0	0	0	0	0
39969	35	77	160	30.0781	0	6	42	6.96	3.88	0.27	agonist	0.557471	13	3262.5	4280	10.6	21	18	12	12	1	6	6	6	2	0	0	0	0	0	0	0	0
41481	26	70	157	28.3987	1	1	46	4.94	2.76	0.4	agonist	0.558704	12	1950	2156	9.8	15	15	13	13	2	4	9	9	451	2	2	404	0	0	0	0	0
35217	27	81	170	28.0277	0	4	30	6.1	3.42667	0.23	agonist	0.561749	12	2100	1289	10.9	7	7	7	7	1	4	6	6	131	1	1	386	1	1	1	0	0
42264	34	71	155	29.5525	1	8	52	5.73	3.24	0.38	agonist	0.565445	15	2400	1047	11.6	8	7	6	5	1	2	1	1	2	0	0	0	0	0	0	0	0
41652	36	57	151	24.9989	1	9	50	6.72	3.81333	0.32	agonist	0.56746	11	2000	578	14.2	10	10	7	6	1	0	4	4	8	0	0	0	0	0	0	0	0
42905	28	55	163	20.7008	1	1	66	4.7	2.68	0.3	agonist	0.570213	9	950	3656	9.4	15	15	14	14	1	9	8	8	602	1	1	390	1	1	0	1	0
47088	28	65	153	27.7671	1	1		5.51	3.16	0.18	agonist	0.573503	13	1987.5	1668.8	13.2	11	11	6	6	1	3	2	2	453	1	1	400	1	1	1	0	0
22919	25	62	163	23.3355	0	2	39	3.53	2.05333	0.34	agonist	0.581681	13	1800	1247	12.2	14	12	11	11	2	8	7	5	50	0	0	0	0	0	0	0	0
21765	38	64	161	24.6904	1	5	32	5.9	3.45333	0.41	agonist	0.585311	9	1800	2545	10.7	16	13	11	11	1	5	5	5	615	1	1	390	1	1	1	0	0
21851	38	82	159	32.4354	1	1	34	6.09	3.66667		agonist	0.60208	28	6675	384	9.8	3	3	3	3	2	0	2	0	2	0	0	0	0	0	0	0	0
24390	29	65	158	26.0375	1	1	39	7.92	4.82667	0.66	agonist	0.609428	13	2662.5	2466	12.7	16	12	12	12	1	5	4	4	695	1	2	383	0	0	0	0	0
44369	26	54	162	20.5761	1	1	28	5.48	3.34667	0.34	agonist	0.610706	12	1175	675	17.2	11	9	8	8	1	4	5	5	515	1	1	395	1	1	0	1	0
7763	37.4	24.65	24.65	24.65	1	3	53	4.56	2.78667		agonist	0.611111	12	2550	1696	13.1	16	15	12	11	1	6	7	7	689	1	1	37+3	1	1	0	1	0
27082	33	64	162	24.3865	1	2	55	5.09	3.13333	0.32	agonist	0.615586	9	1675	1023	13.1	9	4	2	2	1	0	1	1	27	0	0	0	0	0	0	0	0
20975	29.8	23.73	23.73	23.73	1	5	54	5.47	3.37333		agonist	0.616697	11	1350	2323	10.2	21	21	16	16	2	4	2	0	2	0	0	0	0	0	0	0	0
44253	24	72	162	27.4348	0	4	78	5.66	3.49333	0.15	agonist	0.617197	14	2175	511	12.5	14	11	5	5	1	2	6	6	362	1	1	402	1	1	1	0	0
48371	23	62	166	22.4996	0	3	41	3.6	2.26667	0.52	agonist	0.62963	17	1950	1272	12	13	8	5	5	1	1	0	0	500	2	1	394	1	1	1	0	0
17804	28.2	27.1	27.1	27.1	0	4	48	4.9	3.12		agonist	0.636735	15	1325	228	10.9	6	5	5	5	2	2	2	0	442	1	1	33+4	1	1		1	0
23956	29	66	160	25.7812	0	5	42	5.78	3.69333	1	agonist	0.638985	13	1675	1335	10.5	7	7	5	5	2	1	3	0	353	2	2	382	1	1	0	1	0
19887	25	57	160	22.2656	1	1	65	8.01	5.14667	0.67	agonist	0.64253	12	1650	616	10.3	6	6	5	5	2	1	2	0	756	2	3	382	1	1	1	0	0
45167	31	57	160	22.2656	1	1	36	3.83	2.46667	0.62	agonist	0.644038	11	1350	1422.8	9.9	13	12	7	7	1	5	4	4	11	0	0	0	0	0	0	0	0
38068	30	73	162	27.8159	1	4	58	7.78	5.01333	0.17	agonist	0.644387	9	3300	1197	11	16	14	12	11	1	5	6	6	171	1	1	374	1	1	0	1	0
21651	20	65	164	24.1672	0	3	43	6.51	4.2	0.43	agonist	0.645161	11	1325	886	8.2	8	6	4	4	2	2	4	2	922	2	2	344	1	2	1	1	0
21986	24	47	155	19.563	0	2	45	6.28	4.05333	0.63	agonist	0.645435	13	1575	1301	10.1	22	22	8	8	2	0	2	0	989	1	1	414	1	1	1	0	0
22577	28	80	173	26.7299	1	3	39	6.13	4.01333	0.41	agonist	0.654704	13	1462.5	620	11.1	9	9	7	7	2	5	2	1	828	2	2	423	1	2	1	1	0
40789	28	58	160	22.6562	1	6		6.26	4.16	0.19	agonist	0.664537	8	1200	2882.3	10.7	15	11	10	10	1	7	7	7	209	1	0	0	0	0	0	0	0
41302	30	58	155	24.1415	0	2	50	6.49	4.32	0.19	agonist	0.665639	11	1650	514	11	5	4	2	2	1	0	2	0	1	0	0	0	0	0	0	0	0
21315	33	46	155	19.1467	1	8	48	6.1	4.09333	0.62	agonist	0.671038	11	1500	4166	9.8	24	18	12	11	2	0	2	0	1061	1	1	391	1	1	0	1	1
40209	25	57	158	22.8329	1	3	33	5.06	3.4	0.46	agonist	0.671937	12	1500	0	10.5	11	0			2		4	4	71	2	2	323	1	2	2	0	0
24441	28	57	152	24.6711	0	3	43	6.62	4.48	0.7	agonist	0.676737	11	1150	3651	11.9	13	12	9	9	1	4	4	4	496	1	1	404	1	1	0	1	0
21942	22	55	160	21.4844	1	4	57	5.12	3.48	0.86	agonist	0.679688	12	1725	2596	11.6	21	19	14	14	2	2	1	1	333	1	1	400	1	1	1	0	0
14684	27.7	21.3	21.3	21.3	1	3	40	3.48	2.38667		agonist	0.685824	10	1025	1150	10.9	18	17	13	13	2	6	12	8	1368	2	2	17+6	0	0	0	0	0
48252	28	50	166	18.1449	1	2	75	6.57	4.52	0.17	agonist	0.687976	12	2475	3694	13.9	24	20	16	15	1	6	1	1	190	1	1	391	1	1	0	1	1
14847	27.9	37.04	37.04	37.04	0	1	29	4.45	3.06667		agonist	0.689139	22	3600	3661	10.2	12	12	4	4	2	0	2	0	1	0	0	0	0	0	0	0	0
10650	32	75	160	29.2969	1	2	40	6.05	4.17333	0.36	agonist	0.689807	13	3150	3187	7.3	22	11	5	5	1	1	3	3	142	1	1	0	0	0	0	0	0
39297	36	55	158	22.0317	0	1	28	5.85	4.04	0.16	agonist	0.690598	9	2100	2115.6	12.5	16	16	14	14	1	2	0	0	183	1	1	371	1	1	1	0	0
23081	21	52	150	23.1111	0	4	32	6.81	4.70667	0.48	agonist	0.69114	8	1050	1293	12	13	13	8	8	1	3	4	4	1143	1	1	393	1	1	0	1	0
16164	34	64	166	23.2254	0	2	45	5.89	4.08	0.43	agonist	0.692699	7	1350		9	10	4	3	3	2	1	2	0	54	0	0	0	0	0	0	0	0
21811	32	55	167	19.721	1	1	57	7.5	5.21333	0.61	agonist	0.695111	11	1500	3467	9.8	18	15	12	12	2	10	6	6	80	0	0	0	0	0	0	0	0
40478	33	48	160	18.75	0	7	61	8.65	6.02667	0.24	agonist	0.696724	11	1625	0	13.4	12	12			1		5	5	1	0	0	0	0	0	0	0	0
22362	33	57	162	21.7193	1	5	58	4.95	3.45333	0.2	agonist	0.697643	9	1125		11.3	18	12	12	12	1	2	2	2	673	1	1	405	1	1	1	0	0
39136	25	53	153	22.6409	0	6	33	8.09	5.68	0.13	agonist	0.702101	9	1725	1849.8	14.3	15	13	11	11	1	5	7	6	93	0	0	0	0	0	0	0	0
21340	24	49	158	19.6283	0	6	32	7.08	4.97333	0.67	agonist	0.702448	12	1875	1526	10.1	4	4	3	3	2	1	1	0	2	0	0	0	0	0	0	0	0
46660	29	59	160	23.0469	0	7	32	9.88	6.94667	0.29	agonist	0.703104	13	2700	3401.6	9.8	16	16	15	15	1	2	3	3	327	1	1	406	1	1	0	1	0
25637	32	67	158	26.8386	1	2	70	6.13	4.32		agonist	0.704731	12	1500	2744	11.8	18	18	15	15	1	12	9	9	3	0	0	0	0	0	0	0	0
20183	29.7	21.23	21.23	21.23	1	1	55	10.04	7.17333		agonist	0.714475	9	1163	2582	8	15	13	12	12	2	6	8	6	398	1	0	0	0	0	0	0	0
22392	30	62	161	23.9188	1	5	31	7.58	5.42667	0.51	agonist	0.715919	13	2437.5	2487	11.9	19	18	16	16	2	4	2	1	139	2	2	333	1	2	0	2	0
21125	23	55	160	21.4844	0	2	35	6.08	4.36	0.6	agonist	0.717105	12	1650	2107	12.3	15	14	11	11	2	2	4	0	95	1	1	416	1	1	0	1	0
21830	26	55	165	20.202	0	3	59	7.8	5.62667	0.59	agonist	0.721368	9	1050	1504	15.5	4	4	3	3	2	1	1	0	1100	2	2	374	1	2	2	0	0
23626	24	47	154	19.8178	0	3	42	2.51	1.82667		agonist	0.727756	9	1050	891	12.1	13	13	11	11	1	6	6	6	261	1	1	382	1	1	0	1	0
46982	30	54	150	24	1	4	36	6.84	4.98667	0.39	agonist	0.729045	12	1500	2531.6	9.3	23	19	13	13	1	2	1	1	2	0	0	0	0	0	0	0	0
37854	27	75	160	29.2969	1	1		5.81	4.24	0.27	agonist	0.729776	15	2550	1627	9.4	6	4	4	4	2	0	4	0	189	1	0	0	0	0	0	0	0
22099	28	80	163	30.1103	1	3	25	9.02	6.73333	0.78	agonist	0.746489	15	2625	1101	14.6	18	12	10	10	2	1	2	0	2	0	0	0	0	0	0	0	0
20745	28	56	155	23.3091	0	4	55	4.22	3.16	0.7	agonist	0.748815	8	887.5	2287	13.3	9	3	2	2	2	0	1	0	2	0	0	0	0	0	0	0	0
46891	25	67	170	23.1834	0	3	50	6.11	4.64	0.27	agonist	0.759411	11	1725	1328.9	15	23	16	11	11	1	2	2	2	2	0	0	0	0	0	0	0	0
22836	33	80	172	27.0416	1	7	38	7.5	5.76	0.42	agonist	0.768	10	1950	1299	19.2	8	7	4	4	2	0	3	0	168	1	1	402	1	1	1	0	0
45516	31	72	160	28.125	0	3	45	6.14	4.72	0.23	agonist	0.76873	10	1800	1611.6	10.5	22	19	15	15	1	5	5	5	43	0	0	0	0	0	0	0	0
42469	29	42	155	17.4818	0	2	66	4.66	3.61333		agonist	0.775393	12	1950	3726	10.2	10	6	5	5	1	0	0	0	39	0	0	0	0	0	0	0	0
42596	24	72	163	27.0993	1	4	64	6.73	5.24	0.35	agonist	0.778603	12	1800	435	9.1	10	10	10	9	1	7	7	7	105	1	1	405	1	1	0	1	0
23540	28	72	163	27.0993	0	2	43	6.19	4.82667	0.53	agonist	0.779752	11	1800	2216	12.2	20	18	16	15	1	12	9	9	38	0	0	0	0	0	0	0	0
27073	31	55	165	20.202	0	4	44	8.2	6.4	0.4	agonist	0.780488	14	1725	1067	14	5	5	5	5	1	2	2	2	2	0	0	0	0	0	0	0	0
24071	29	55	160	21.4844	1	3	41	7.55	5.90667	0.49	agonist	0.78234	15	1875	3196	10.9	12	12	11	10	1	8	7	7	1117	1	1	404	1	1	1	0	0
42000	33	71	160	27.7344	1	1	37	8.73	6.86667	0.31	agonist	0.78656	12	2475	1715	13.2	10	9	9	9	1	3	4	4	93	1	1	401	1	1	1	0	0
25978	32	75	160	29.2969	1	6	68	7.2	5.66667	0.48	agonist	0.787037	10	1350		15.2	20	19	18	18	1	9	4	4	4	0	0	0	0	0	0	0	0
46149	32	64	153	27.3399	0	5	41	6.69	5.28	0.21	agonist	0.789238	9	1950	2036	14.7	23	17	14	14	1	2	2	2	28	0	0	0	0	0	0	0	0
42636	35	66	150	29.3333	0	7	36	6.5	5.13333	0.19	agonist	0.789744	14	2100	569	10.4	4	2	2	2	1	0	1	0	2	0	0	0	0	0	0	0	0
7655	37	27.68	27.68	27.68	1	2	63	5.68	4.49333		agonist	0.79108	6	1350	335	8.8	12	12	10	9	2	2	2	1	2429	1	1	40+2	1	1	1	0	0
26489	31	65	170	22.4913	0	10	38	6.6	5.22667	0.97	agonist	0.791919	11	2375	3904	10.1	19	16	11	11	1	8	7	7	1921	1	1	382	1	1	1	0	0
44796	25	55	160	21.4844	1	1	37	2.12	1.69333	0.25	agonist	0.798742	12	1500	3642	9.1	20	14	7	7	1	5	3	3	181	1	1	386	0	0	0	0	0
22178	33	65	155	27.0552	0	10	38	5.66	4.53333	0.4	agonist	0.800942	10	2250	505	9.5	22	18	17	17	2	11	8	8	2	0	0	0	0	0	0	0	0
39658	24	90	168	31.8878	0	2	37	4.3	3.45333	0.56	agonist	0.803101	12	2600	2321	10.9	35	33	22	22	1	12	14	13	137	1	1	393	1	1	1	0	0
26286	27	65	164	24.1672	0	3	30	6.95	5.58667	0.34	agonist	0.803837	10	2175	1275	7.9	13	12	12	12	1	4	3	3	1063	1	1	404	1	1	1	0	0
14334	27.1	26.57	26.57	26.57	0	2	42	4.34	3.49333		agonist	0.804916	12	2250	1995	15.4	20	17	14	13	2	2	2	0	851	1	1	38+5	1	1	1	0	0
41822	27	50	160	19.5312	0	1	48	4.52	3.64	0.2	agonist	0.80531	12	1125	2925.9	11.5	9	9	8	8	1	4	2	2	582	1	1	364	1	2	0	2	0
45500	25	64	156	26.2985	1	2	38	7.14	5.76	0.3	agonist	0.806723	13	2425	5186	10	20	20	19	19	1	12	11	11	260	1	2	371	1	2	0	2	0
42380	32	55	158	22.0317	0	1	50	7.55	6.10667	0.28	agonist	0.80883	9	975	3012	8.4	24	21	15	15	1	2	2	1	210	1	1	390	1	1	0	1	0
45508	28	76	170	26.2976	0	5		5.8	4.69333	0.3	agonist	0.809195	16	3150	1744	15.6	25	22	19	18	1	8	4	4	257	1	1	300	1	1	1	0	0
21377	29	21.37	21.37	21.37	0	3	49	9.22	7.46667		agonist	0.809834	10	1500	2169	10.2	7	5	5	5	2	2	3	1	105	1	1	22+	0	0	0	0	0
40352	29	42	153	17.9418	0	3	65	7.16	5.84	0.23	agonist	0.815642	13	1550	1971	15.1	19	18	16	16	1	8	5	5	26	0	0	0	0	0	0	0	0
23121	30	53	155	22.0604	1	1	32	6.27	5.14667	0.44	agonist	0.82084	13	1650	1790	8	10	9	6	6	1	3	2	2	1002	1	2	315	1	2	0	2	0
22120	24	66	162	25.1486	1	2	39	7.24	5.96	0.62	agonist	0.823204	10	1100	2243	10.4	11	10	6	5	2	2	4	2	532	1	1	420	1	1	0	1	0
43493	25	75	157	30.4272	0	4	71	6.27	5.18667	0.31	agonist	0.82722	11	1650	2341	14.5	21	19	11	11	1	1	2	1	2	0	0	0	0	0	0	0	0
43493	26	75	157	30.4272	0	4	35	6.27	5.18667	0.31	agonist	0.82722	10	1350	2592.9	12.9	14	12	11	11	1	2	3	3	289	1	1	386	1	1	1	0	0
16613	28	57	163	21.4536	0	3	39	6.38	5.28	0.34	agonist	0.827586	10	2400	1965	9.1	11	9	7	7	2	2	1	0	2	0	0	0	0	0	0	0	0
44386	29	75	162	28.578	0	3	28	6.52	5.4	0.32	agonist	0.828221	9	1125	1923.9	11.4	14	14	11	5	1	1	3	3	232	1	1	396	1	1	1	0	0
26688	33	62	155	25.8065	1	3	37	5.59	4.64	0.35	agonist	0.830054	12	2000	2487	11.8	11	9	9	9	1	5	2	2	301	1	1	17+	0	0	0	0	0
42958	39	45	157	18.2563	1	4	31	5.94	4.96	0.28	agonist	0.835017	13	1800	2921	12.3	16	16	13	13	1	2	9	8	2	0	0	0	0	0	0	0	0
40419	32	55	155	22.8928	1	11	39	7.74	6.50667	0.36	agonist	0.840655	12	1325	1060	13.3	21	20	16	15	1	3	5	4	109	0	0	0	0	0	0	0	0
38762	32	53	165	19.4674	1	1	47	6.77	5.69333	0.21	agonist	0.840965	9	800	1771	12.2	18	14	13	13	1	0	1	1	932	1	1	390	1	1	0	1	0
41977	33	52	160	20.3125	1	5	61	5.88	4.96		agonist	0.843537	10	1050	2306	6.5	16	12	11	11	1	4	5	5	1198	1	1	370	1	1	0	1	0
37625	33	57	158	22.8329	0	5	43	7.33	6.18667	0.17	agonist	0.84402	21	4050	3041	9	18	16	13	13	1	2	6	6	1437	1	1	392	1	1	1	0	0
14342	27	52	155	21.6441	0	2	46	5.39	4.57333	0.37	agonist	0.848485	13	1500	1310	7.6	3	3	3	3	2	1	3	1	515	1	1	386	1	1	1	0	0
16164	34.2	23.23	23.23	23.23	0	2	66	5.96	5.08		agonist	0.852349	7	1050	406	10.3	4	3	3	3	2	0	0	0	1	0	0	0	0	0	0	0	0
21262	28	19.98	19.98	19.98	1	1	49	6.75	5.76		agonist	0.853333	10	1050	2984	11	11	10	8	8	2	2	2	2	2	0	0	0	0	0	0	0	0
40704	37	56	158	22.4323	1	9	60	5.91	5.08	0.23	agonist	0.85956	11	2300	2405	14.8	17	17	14	14	1	6	6	6	2	0	0	0	0	0	0	0	0
22931	27	55	160	21.4844	1	3	40	7.45	6.41333	0.49	agonist	0.86085	16	2700	2617	8.5	7	5	5	5	2	1	4	2	788	1	1	386	0	0	0	0	0
23463	29	52	156	21.3675	0	4	35	6.09	5.26667	0.71	agonist	0.864806	15	2475		12.6	17	14	13	13	1	10	9	9	1716	1	1	373	1	1	1	0	0
44574	27	55	158	22.0317	1	1	42	5.88	5.12	0.21	agonist	0.870748	10	1175	3042	10.1	18	16	16	16	1	10	7	7	11	0	0	0	0	0	0	0	0
20848	27	75	170	25.9516	1	2	35	4.94	4.30667	0.84	agonist	0.871795	25	4725	2329	9.3	4	4	4	4	2	2	2	2	201	1	1	342	1	1	1	0	0
45494	29	65	158	26.0375	1	1	50	6.1	5.33333	0.45	agonist	0.874317	16	2850	1903	10.2	18	18	13	13	1	4	4	4	18	0	0	0	0	0	0	0	0
38569	25	56	164	20.8209	1	1	41	6.65	5.82667	0.29	agonist	0.87619	13	1800	1511	8.5	19	19	18	18	1	11	6	6	211	1	1	395	1	1	1	0	0
39130	27	45	150	20	1	3	72	5.79	5.09333	0.35	agonist	0.879678	10	1800	3163.4	7.5	15	14	9	9	1	4	4	4	350	1	1	0	0	0	0	0	0
41749	32	51	161	19.6752	0	1	29	4.66	4.12	0.22	agonist	0.88412	10	1425	2856	10.7	17	13	9	9	1	4	4	4	377	1	1	393	1	1	0	1	0
42574	23	62	156	25.4767	0	4	34	9.78	8.69333	0.31	agonist	0.888889	15	1725	622	11.9	11	9	9	9	1	6	5	5	109	1	1	383	1	1	1	0	0
23448	33	47	160	18.3594	1	3	33	9.24	8.29333	0.6	agonist	0.897547	14	2212.5	3428	12.8	12	10	10	10	2	4	7	5	39	0	0	0	0	0	0	0	0
39411	30	62	158	24.8358	0	2	31	8.74	7.86667	0.42	agonist	0.900076	18	2962.5	2722	11.2	23	20	17	17	1	6	11	11	42	0	0	0	0	0	0	0	0
21663	27	43	150	19.1111	0	2	37	5.09	4.58667	0.64	agonist	0.901113	11	1275	2642	11.1	15	15	14	14	1	8	3	3	2	0	0	0	0	0	0	0	0
47615	26	54	155	22.4766	0	4	38	5.9	5.32	0.28	agonist	0.901695	10	975	3216	11	19	14	13	13	1	2	4	3	99	1	2	350	1	2	2	0	0
16950	29	44	155	18.3143	1	1	35	7.39	6.66667		agonist	0.90212	10	825	1016	9	11	10	8	8	1	3	4	4	2	0	0	0	0	0	0	0	0
47782	25	60	163	22.5827	0	2	28	5.52	4.98667	0.27	agonist	0.903382	8	1300	1574.4	11.4	22	20	13	13	1	4	3	3	2	0	0	0	0	0	0	0	0
42405	24	78	165	28.6501	0	2	19	8.57	7.76	0.19	agonist	0.905484	15	4800	1277	10.2	13	11	6	4	1	0	2	2	107	1	2	276	1	2	0	2	0
47435	30	55	150	24.4444	0	9	29	6.89	6.25333	0.38	agonist	0.907596	11	1500	1173	9.4	9	9	9	9	1	7	3	3	162	1	1	396	1	1	1	0	0
27043	28	60	162	22.8624	1	2	30	4.7	4.26667	0.55	agonist	0.907801	10	1350	4606	8.3	18	17	16	14	1	5	6	6	401	1	1	375	1	1	1	0	0
47599	27	56	150	24.8889	1	1	38	5.92	5.38667	0.44	agonist	0.90991	11	1050	3344	11.5	25	19	17	17	1	8	3	2	234	1	1	395	1	1	0	1	0
47922	22	60	163	22.5827	0	5	39	5.83	5.33333	0.19	agonist	0.914808	13	1387.5	4027.1	11.8	20	20	15	15	1	6	7	7	2	0	0	0	0	0	0	0	0
23483	36	77	163	28.9811	0	1	37	6.34	5.8	0.59	agonist	0.914826	12	1912.5	2050	10.4	18	15	13	13	1	8	5	5	2	0	0	0	0	0	0	0	0
16262	27.9	27.47	27.47	27.47	0	3	44	4.66	4.26667		agonist	0.915594	15	2025	1596	10.6	10	8	7	6	2	0	0	0	2	0	0	0	0	0	0	0	0
24181	28	51	161	19.6752	0	2	29	6.71	6.14667	0.37	agonist	0.916046	11	900	930	13.5	7	7	5	4	2	2	3	1	2	0	0	0	0	0	0	0	0
21647	30	77	159	30.4577	1	6	40	5.95	5.46667	0.76	agonist	0.918768	16	2150	2048	10.9	15	15	12	11	2	2	3	1	604	1	1	381	1	1	0	1	0
19782	27	53	158	21.2306	1	2	43	6.42	5.92	0.51	agonist	0.922118	11	1150	4620	7.9	22	15	14	14	2	6	9	9	340	1	2	370	1	2	0	2	1
19653	25	75	168	26.5731	1	2	42	8.69	8.04	0.43	agonist	0.925201	10	1125	1123	9.1	11	7	4	4	2	1	2	0	472	1	1	402	1	1	1	0	0
21518	28.1	18.8	18.8	18.8	0	2	48	9.19	8.54667		agonist	0.929996	9	1350	1384	10.1	7	6	3	3	2	0	1	0	503	1	1	36+4	1	1	0	1	0
22286	27	44	160	17.1875	1	3	54	5.9	5.49333	0.46	agonist	0.931073	12	2250	4373	12.1	17	12	7	7	2	1	3	0	97	1	1	390	0	0	0	0	0
39204	29	63	158	25.2363	1	2	62	8.19	7.62667	0.21	agonist	0.931217	12	2400	1321	8.5	16	15	13	13	1	4	3	3	12	0	0	0	0	0	0	0	0
23142	38	63	158	25.2363	0	2	44	7.21	6.76	0.62	agonist	0.937587	8	1275	609	7	6	6	6	6	2	2	4	2	210	1	1	393	1	1	0	1	0
24572	26	68	167	24.3824	0	2	42	5.95	5.61333	0.67	agonist	0.943417	13	2250	3518	10.4	11	9	9	9	2	1	5	5	648	1	1	390	1	1	0	1	0
25381	30	63	150	28	0	6	33	5.14	4.85333	0.65	agonist	0.944228	16	1762.5	2180	10.5	4	4	4	3	2	0	1	0	2	0	0	0	0	0	0	0	0
24079	35	69	170	23.8754	1	1	32	5.58	5.28	0.5	agonist	0.946237	17	2850	531	8.8	7	7	7	7	2	2	1	1	2	0	0	0	0	0	0	0	0
23664	27	50	157	20.2848	1	2	70	5.9	5.58667	0.36	agonist	0.946893	10	1350	3997	7	14	12	8	7	2	0	3	0	592	1	1	0	0	0	0	0	0
11353	36.1	21.34	21.34	21.34	1	1	53	7.31	7.01333		agonist	0.959416	15	2625	1645	9	16	16	14	14	2	3	5	5	2	0	0	0	0	0	0	0	0
45457	29	53	151	23.2446	0	4	50	6.03	5.8	0.27	agonist	0.961857	17	2587.5	1786	10.9	12	11	6	6	1	2	3	3	326	1	1	361	1	1	1	0	0
24397	27	65	163	24.4646	1	1	39	5.89	5.69333		agonist	0.96661	9	1725	1500	8	13	11	8	8	1	4	7	7	3692	1	1	384	1	1	1	0	0
17795	22	75	160	29.2969	0	1	96	4.55	4.4	0.72	agonist	0.967033	13	1387.5		13	4	1	1	1	1	0	1	0	2	0	0	0	0	0	0	0	0
25535	42	73	160	28.5156	1	5	31	7.91	7.65333	0.74	agonist	0.967552	13	2700	1873	12.6	12	12	9	9	1	2	4	4	3684	1	1	395	1	1	0	1	0
23386	35	83	162	31.6263	0	3	62	7.78	7.53333	0.61	agonist	0.968295	15	2687.5		12.6	7	5	3	3	2	1	1	0	2	0	0	0	0	0	0	0	0
42236	27	62	160	24.2188	1	4	35	5.74	5.57333	0.33	agonist	0.970964	15	2400	2877	11.9	11	11	7	7	1	4	2	1	2	0	0	0	0	0	0	0	0
21379	28	60	168	21.2585	0	1	52	8.16	7.94667	0.63	agonist	0.973856	11	1425	3367	11	27	21	15	15	2	4	3	1	381	2	2	375	1	2	2	0	1
27565	25	56	155	23.3091	0	4	40	8.22	8.01333	0.52	agonist	0.974858	13	1312.5	5103	16	18	18	10	10	1	9	12	12	751	1	1	394	1	1	1	0	0
24427	29	50	161	19.2894	1	5	38	4.89	4.77333	0.44	agonist	0.976142	8	1575	874	13.1	18	17	15	14	1	1	7	4	624	1	1	0	0	0	0	0	0
38980	26	73	155	30.385	1	5	78	7.14	6.97333		agonist	0.976657	13	2850	1010	10.8	21	14	12	12	1	6	7	7	865	1	1	392	1	1	1	0	0
40748	38	62	160	24.2188	1	3	42	6.41	6.29333	0.22	agonist	0.981799	16	2250	550	8.8	4	4	4	4	1	1	4	0	2	0	0	0	0	0	0	0	0
21857	39	75	162	28.578	0	10	40	6.35	6.24	0.24	agonist	0.982677	23	5175		14.1	13	10	4	4	2	2	3	0	852	2	1	372	1	1	1	0	0
15052	30.6	27.06	27.06	27.06	1	1	70	2.83	2.78667		agonist	0.984688	13	3075	2166	10	16	14	14	14	2	4	2	0	432	1	1	11+4	0	0	0	0	0
24117	33	47	162	17.9089	1	1	40	7.57	7.46667	0.47	agonist	0.98635	17	1650	3150	9.9	17	15	15	15	1	12	14	14	689	1	1	403	1	1	0	1	0
27294	30	48	160	18.75	1	2	42	6.84	6.74667	0.2	agonist	0.986355	9	1300	2353.8	11.1	12	9	7	7	1	5	4	4	124	1	1	383	1	1	1	0	0
46062	28	45	150	20	0	3		8.03	7.93333	0.3	agonist	0.987962	10	1025	1234	12	18	15	13	13	1	1	2	2	188	1	1	391	1	1	1	0	0
28385	36	50	155	20.8117	1	2	50	7.34	7.29333	0.22	agonist	0.993642	14	1750	2333.9	11.2	16	16	14	14	1	9	8	8	15	0	0	0	0	0	0	0	0
16404	32.8	20.08	20.08	20.08	0	4	34	7.03	6.98667		agonist	0.993836	10	1200	1357	8.4	16	16	13	13	2	8	7	7	2	0	0	0	0	0	0	0	0
43561	26	70	160	27.3438	0	5	60	7.77	7.73333	0.36	agonist	0.995281	16	3225	1887	10.2	7	7	4	4	1	1	2	1	201	1	1	372	1	1	1	0	0
47149	31	75	163	28.2284	0	7	52	7.07	7.04	0.29	agonist	0.995757	12	2925	1181	12	9	8	7	6	1	4	4	4	132	1	1	13+	0	0	0	0	0
21428	27.7	16.9	16.9	16.9	0	3	49	7.24	7.21333		agonist	0.996317	11	1500	3093	14.9	14	10	5	5	2	1	2	0	312	1	1	9+6	0	0	0	0	0
21428	28	46	165	16.8962	1	1	52	7.24	7.21333	0.26	agonist	0.996317	12	1650	3098	14.5	10	9	7	7	2	2	5	5	1799	1	1	403	1	1	0	1	0
47431	26	48	150	21.3333	1	4	44	7.58	7.56	0.19	agonist	0.997361	10	1350	2897	11.7	19	18	15	15	1	6	9	9	241	1	1	390	1	1	0	1	0
25184	30	44	153	18.7962	1	7	72	6.62	6.61333	0.28	agonist	0.998993	10	1500	2860	9.8	16	13	12	12	1	6	10	10	2	0	0	0	0	0	0	0	0
41424	29	42	157	17.0392	0	8	39	6.15	6.16	0.17	agonist	1.00163	12	1575	1817	13.3	24	23	21	19	1	12	4	4	1865	1	1	401	1	1	0	1	0
46472	29	55	165	20.202	0	4	28	6.13	6.14667	0.25	agonist	1.00272	10	1100	3840	12.5	15	12	12	12	1	2	0	0	5	0	0	0	0	0	0	0	0
23155	24	63	161	24.3046	1	4	39	8.16	8.18667	0.64	agonist	1.00327	10	1012.5	1526	8.8	10	7	6	6	2	3	2	0	495	1	1	402	1	1	0	1	0
19603	27.3	23.83	23.83	23.83	0	3	51	8.11	8.18667		agonist	1.00945	14	2025	3897	10.2	18	15	5	4	2	2	5	0	1672	2	2	34+3	1	2	1	1	0
45985	37	59	150	26.2222	1	2	36	7.94	8.04	0.31	agonist	1.01259	14	4150	1404.6	8.6	9	6	4	4	1	3	1	1	77	1	1	8+	0	0	0	0	0
20753	32.5	18.59	18.59	18.59	0	1	50	6.07	6.14667		agonist	1.01263	11	1950	535	10.8	5	5	3	3	2	0	1	0	166	1	1	39	1	1	1	0	0
19049	25.8	21.78	21.78	21.78	0	2	49	7.43	7.53333		agonist	1.01391	10	1425	6098	13	18	18	11	11	2	7	6	4	23	0	0	0	0	0	0	0	0
24880	24	70	155	29.1363	0	2	44	5.97	6.05333	0.58	agonist	1.01396	20	4312.5	1601	12.8	14	9	7	7	1	0	2	2	555	1	1	390	1	1	0	1	0
44300	24	48	154	20.2395	0	2	35	7.2	7.30667	0.23	agonist	1.01481	13	1350	316.9	15.6	8	4	3	3	1	0	0	0	69	0	0	0	0	0	0	0	0
42439	34	53	155	22.0604	1	1	38	7.56	7.68		agonist	1.01587	13	2675	5732	6.3	22	21	19	18	1	7	11	11	315	1	1	400	1	1	0	1	1
22524	24	75	158	30.0433	0	3	39	6.66	6.77333	0.4	agonist	1.01702	8	1350	1049	9	4	2	2	2	2	0	1	0	27	0	0	0	0	0	0	0	0
26469	27	75	160	29.2969	0	2	39	8.9	9.05333	0.56	agonist	1.01723	15	2625	2449	14	15	13	9	9	1	6	5	5	19	0	0	0	0	0	0	0	0
40182	31	63	168	22.3214	1	6	50	7.59	7.77333	0.39	agonist	1.02415	10	1200	708	14.1	5	5	3	3	2	0	2	0	607	2	2	405	1	1	0	1	0
38634	32	73	169	25.5593	0	3		7.05	7.24	0.24	agonist	1.02695	10	2100	2764	11.1	23	23	21	21	1	15	7	7	197	1	1	350	1	1	0	1	0
13636	28	59	159	23.3377	1	5	27	8.93	9.18667	0.69	agonist	1.02874	10	1087.5	1650	9.3	12	11	10	9	2	2	8	8	817	1	1	413	1	1	1	0	0
22423	29	52	161	20.061	0	2	79	3.14	3.24		agonist	1.03185	13	1800	240	11.2	14	13	13	12	2	2	5	0	1356	2	2	352	1	2	0	2	0
20503	30.1	23.44	23.44	23.44	0	6	52	6.11	6.30667		agonist	1.03219	11	2175	2197	10	15	14	8	8	2	3	4	2	27	0	0	0	0	0	0	0	0
24581	29	53	157	21.5019	1	1	43	5.28	5.48	0.64	agonist	1.03788	13	2175	386	10.9	13	13	13	13	1	5	4	4	694	1	1	23+	0	0	0	0	0
46452	27	64	165	23.5078	0	4	46	6.56	6.84	0.27	agonist	1.04268	14	3300	2652	14	11	11	9	9	1	4	8	8	266	1	1	385	1	1	1	0	0
24014	29	59	160	23.0469	1	3	57	4.37	4.56	0.99	agonist	1.04348	12	850		10.2	9	8	4	4	2	0	2	0	393	1	1	391	1	1	0	1	0
39708	25	56	162	21.3382	0	3	34	4.83	5.04	0.3	agonist	1.04348	10	1650	2592.2	9.5	29	22	15	15	1	6	8	8	227	1	1	386	1	1	1	0	0
24442	23	72	166	26.1286	0	2	38	6.04	6.32	0.49	agonist	1.04636	10	1025	3470	11.6	12	11	2	2	2	0	1	0	557	1	1	405	1	1	0	1	0
27396	28	70	154	29.5159	0	3	86	9.17	9.62667	0.53	agonist	1.0498	12	2025	2217	9.7	10	7	3	3	1	0	1	1	2553	1	1	400	1	1	0	1	0
23702	33	53	165	19.4674	1	5	57	9.57	10.0533	0.48	agonist	1.05051	17	2850	2698	13.2	14	10	7	7	2	2	2	1	2	0	0	0	0	0	0	0	0
17789	35.4	22.66	22.66	22.66	1	2	47	3.84	4.05333		agonist	1.05556	13	1300	1498	11	10	10	7	7	2	6	5	3	147	1	1	37+5	1	1	1	0	0
44042	26	53	155	22.0604	1	1	39	6.86	7.28	0.32	agonist	1.06122	11	1425	3323	8.8	15	15	12	10	1	5	6	6	2	0	0	0	0	0	0	0	0
17590	32.4	24,77	24,77	24.77	0	7	35	5.91	6.30667		agonist	1.06712	13	1625	2947	13.4	9	9	9	9	2	6	7	4	302	1	1	39+6	1	1	1	0	0
22572	26	46	159	18.1955	0	5	29	5.66	6.04	0.69	agonist	1.06714	13	1125	4670	10	21	16	14	14	1	6	7	7	2323	1	1	423	1	1	1	0	0
43255	38	59	163	22.2063	1	8	28	5.85	6.28	0.17	agonist	1.0735	12	1800	1265	12.2	13	8	8	8	1	0	0	0	160	1	1	395	1	1	0	1	0
14548	30.6	18.9	18.9	18.9	0	1	54	5.91	6.36		agonist	1.07614	13	1350	3588	12.2	14	13	12	12	2	6	4	0	566	2	2	36+6	1	2	2	0	0
41539	30	53	150	23.5556	0	4	40	7.48	8.05333	0.22	agonist	1.07665	12	1875	2721	10.2	13	9	7	7	1	4	1	1	193	1	1	395	1	1	1	0	0
45243	37	55	161	21.2183	1	1	28	6.43	6.93333	0.23	agonist	1.07828	20	2852.5	3615	9.8	33	33	27	27	1	11	11	11	280	1	1	362	1	1	0	1	1
26606	33	47	162	17.9089	0	5	99	6.6	7.12	0.4	agonist	1.07879	10	2475	1558	9.8	7	7	5	5	1	4	3	2	1277	1	1	392	1	1	1	0	0
40233	30	60	174	19.8177	0	2	56	6.12	6.61333	0.2	agonist	1.08061	11	2100	4076.7	11	21	17	14	13	1	4	3	3	7	0	0	0	0	0	0	0	1
23590	34	77	162	29.34	1	10	71	6.12	6.65333		agonist	1.08715	17	3975	981	13.1	10	9	9	9	2	2	1	1	2	0	0	0	0	0	0	0	0
24218	31	54	164	20.0773	0	1	35	5.59	6.08	0.64	agonist	1.08766	12	1350	1951	13.7	17	11	9	7	2	2	5	5	540	1	1	403	1	1	0	1	0
19197	34	52	163	19.5717	1	3	60	4.09	4.46667	0.27	agonist	1.09209	14	1687.5	2964	6.5	14	14	11	11	1	5	6	6	2	0	0	0	0	0	0	0	0
45264	33	61	166	22.1367	0	3	42	6.74	7.37333	0.24	agonist	1.09397	9	1350	2073.5	9.3	11	10	9	9	1	4	2	2	191	1	1	366	1	1	1	0	0
39183	25	68	160	26.5625	0	4	50	4.94	5.41333	0.32	agonist	1.09582	10	1725	1860	11.2	14	12	10	10	2	2	3	1	173	1	1	403	1	1	1	0	0
41393	34	48	160	18.75	0	9	30	6.13	6.72		agonist	1.09625	12	1350	3121	13.1	21	19	16	16	1	10	13	13	517	1	1	402	1	1	1	0	0
39502	27	70	168	24.8016	0	3	73	6.53	7.16		agonist	1.09648	14	2375	1677	9.4	20	20	17	17	1	10	6	6	1	0	0	0	0	0	0	0	0
19853	26.1	19.14	19.14	19.14	0	3	56	6.24	6.85333		agonist	1.09829	10	1275	1660	10	19	18	13	13	1	5	5	5	409	1	1	39+6	1	1	1		0
46204	31	54	165	19.8347	0	8	31	8.06	8.85333	0.32	agonist	1.09843	15	2300	1070	14.7	9	8	8	8	1	4	2	2	2	0	0	0	0	0	0	0	0
45546	22	60	150	26.6667	0	3	41	5.32	5.85333	0.31	agonist	1.10025	11	1200	6599	11	27	22	10	10	1	4	4	4	37	0	0	0	0	0	0	0	0
24951	31	61	162	23.2434	0	5	38	6.49	7.14667	0.82	agonist	1.10118	12	2275	2734	12.5	6	6	4	4	1	0	3	3	786	1	1	403	1	1	0	1	0
46247	33	55	162	20.9572	1	4	61	5.89	6.53333	0.45	agonist	1.10922	14	2625	3945	9.9	21	17	7	7	1	3	2	2	2	0	0	0	0	0	0	0	1
15011	33	57	156	23.4221	0	5	48	6.28	6.98667	0.75	agonist	1.11253	10	1650	542	7.4	10	9	7	7	2	0	0	0	2	0	0	0	0	0	0	0	0
17110	31	70	158	28.0404	0	5	39	10.76	11.9733	0.53	agonist	1.11276	14	2325	3011	8.6	16	15	11	11	1	8	9	9	2	0	0	0	0	0	0	0	0
44536	30	55	158	22.0317	0	4	38	4.49	5	0.47	agonist	1.11359	9	1875	5332.7	12.1	12	10	7	7	1	2	4	4	2	0	0	0	0	0	0	0	0
39376	34	90	170	31.1419	1	1	40	8.57	9.54667	0.66	agonist	1.11396	13	2800	2865	9.6	7	6	5	5	1	1	2	2	120	1	1	394	1	1	0	1	0
42373	25	60	155	24.974	1	2	43	7.86	8.77333	0.26	agonist	1.1162	12	1950	2990.4	10.2	23	21	19	18	1	8	2	2	99	1	1	0	0	0	0	0	0
43581	38	70	164	26.0262	1	3	37	4.06	4.56	0.34	agonist	1.12315	16	3600	1212	11.1	20	15	11	9	1	3	4	0	1	0	0	0	0	0	0	0	0
26870	26	78	154	32.8892	1	3	42	6.86	7.70667	0.43	agonist	1.12342	17	3225	2012	12.1	9	9	7	7	1	4	4	4	480	1	1	395	1	1	0	1	0
40513	22	70	165	25.7117	0	4	45	5.69	6.45333	0.58	agonist	1.13415	16	2625	1447	9	15	15	11	11	1	8	5	5	130	1	1	386	1	1	1	0	0
43074	31	56	161	21.6041	1	1	39	3.15	3.57333		agonist	1.13439	10	1125	1575	9.6	6	6	3	3	1	3	2	1	322	1	1	0	0	0	0	0	0
17112	26.9	17.22	17.22	17.22	0	3	58	9.25	10.5067		agonist	1.13586	14	2850	945	10.9	19	17	15	14	2	9	10	7	4869	2	2	36+4	1	2	2	0	0
23506	30	62	150	27.5556	1	5	79	6.49	7.37333	0.83	agonist	1.13611	12	1837.5	3971	8.3	11	10	6	5	2	1	2	0	646	1	1	382	1	1	1	0	0
41154	30	64	140	32.6531	0	4	36	7.34	8.36	0.35	agonist	1.13896	12	2700	2574.1	11.9	19	19	15	14	1	1	2	2	30	0	0	0	0	0	0	0	0
21254	29.1	20.7	20.7	20.7	1	2	49	5.6	6.38667		agonist	1.14048	12	1463	1040	11	18	14	9	9	1	7	9	9	759	1	1	38+4	1	1	0	1	0
21254	29	53	160	20.7031	1	2	35	5.6	6.38667	0.24	agonist	1.14048	12	1462.5		11	18	14	9	9	1	7	9	9	759	1	1	384	1	1	0	1	0
48170	25	60	167	21.5139	1	1	59	4.98	5.70667	0.41	agonist	1.14592	11	850	4420	10.9	20	20	18	18	1	12	11	11	426	1	1	393	1	1	1	0	0
27460	31	43	155	17.898	0	9	51	5.98	6.85333	0.69	agonist	1.14604	11	1175	2427	8.2	8	8	7	7	1	1	3	3	296	1	1	400	1	1	1	0	0
43014	25	44	164	16.3593	0	5	25	5.83	6.70667	0.26	agonist	1.15037	9	900	2823	7.4	17	16	15	13	1	6	9	9	243	1	1	361	1	2	0	2	0
44759	26	50	153	21.3593	0	2	29	5.94	6.88	0.5	agonist	1.15825	9	775	4979.5	8.2	29	20	8	8	1	4	1	1	155	1	1	386	1	1	0	1	0
40417	27	70	160	27.3438	0	6	38	7.1	8.24	0.2	agonist	1.16056	13	2175	2854	12.4	8	8	6	6	2	2	5	5	451	2	2	360	1	2	2	0	0
39199	26	52	157	21.0962	0	4	31	3.96	4.6	0.61	agonist	1.16162	11	962.5	1207	9	11	10	7	7	1	1	2	2	489	1	1	384	1	1	1	0	0
23058	29	65	167	23.3067	1	3	47	7.53	8.78667	0.94	agonist	1.16689	15	2212.5	3513	13.2	18	17	11	11	1	7	6	6	2579	1	1	392	1	1	1	0	0
23528	35	68	162	25.9107	1	3	24	4.83	5.68		agonist	1.17598	10	1575		14.5	13	13	11	11	2	3	4	2	269	1	1	390	1	1	1	0	0
37406	29	51	167	18.2868	1	1	30	7.09	8.36	0.34	agonist	1.17913	10	1350	650	10.6	5	3	2	2	2	0	1	0	580	1	1	384	1	1	1	0	0
45859	31	64	157	25.9645	0	2	49	5.83	6.89333	0.44	agonist	1.18239	14	1950	4599	9.2	25	23	19	19	1	14	14	13	139	1	1	395	1	1	0	1	0
40403	29	55	170	19.0311	1	2	38	5.68	6.76	0.54	agonist	1.19014	12	1350	33686	10.9	30	28	25	24	1	14	9	7	215	1	1	401	1	1	0	1	0
44210	29	54	145	25.6837	1	1	67	4.61	5.49333	0.36	agonist	1.19161	13	1350	1853	8.7	10	10	7	6	1	3	1	0	218	1	1	395	1	1	0	1	0
39285	29	73	168	25.8645	0	3	65	4.72	5.62667	0.41	agonist	1.19209	17	2187.5	1745	12.7	17	17	14	14	1	4	3	3	1	0	0	0	0	0	0	0	0
40345	28	57	162	21.7193	1	3	41	6.73	8.02667	0.45	agonist	1.19267	16	2000	1651	10.3	18	17	15	12	1	2	2	2	44	0	0	0	0	0	0	0	0
47050	25	65	158	26.0375	1	6	42	6.72	8.02667	0.4	agonist	1.19444	16	2475	1296	11	8	8	4	4	1	2	0	0	43	1	0	0	0	0	0	0	0
47772	26	52	160	20.3125	0	4	51	4.16	4.97333	0.33	agonist	1.19551	13	1212.5	2264	11.8	16	13	11	11	1	9	3	2	185	1	1	386	1	1	1	0	0
27132	30	52	168	18.424	1	2	61	6.11	7.32	0.51	agonist	1.19804	13	2050	2910	9	17	16	13	13	2	6	10	10	6	0	0	0	0	0	0	0	0
43325	26	55	158	22.0317	1	1	42	6.9	8.26667	0.47	agonist	1.19807	10	1000	1314	11.4	10	9	8	8	1	4	2	2	239	1	1	404	1	1	1	0	0
44625	36	55	160	21.4844	1	1	42	4.84	5.8	0.19	agonist	1.19835	12	1525	2823.7	10.6	26	18	13	13	1	3	7	7	225	1	1	0	0	0	0	0	0
46252	30	52	157	21.0962	1	1	59	5.31	6.37333	0.29	agonist	1.20025	13	2100	2703	10.8	13	11	9	9	1	3	1	1	2000	1	1	396	1	1	1	0	0
22432	33	55	163	20.7008	0	3	35	5.45	6.54667		agonist	1.20122	10	1350		11.5	13	9	5	5	2	2	3	1	590	1	1	404	1	1	1	0	0
41595	31	52	152	22.5069	1	5	45	6.46	7.77333	0.28	agonist	1.2033	12	1075	3175	12.8	12	12	9	9	1	2	1	1	581	1	1	374	1	1	1	0	0
24775	25	46	156	18.902	1	4	41	7.75	9.33333	0.57	agonist	1.2043	12	1262.5	2920	7.1	20	20	20	20	1	14	11	11	1016	1	1	354	1	1	0	1	0
21982	26	48	160	18.75	0	1	78	7.14	8.6	0.62	agonist	1.20448	11	1950	3492	12	15	13	10	9	1	0	0	0	2	0	0	0	0	0	0	0	0
42368	26	47	159	18.591	0	4		9.61	11.5867	0.43	agonist	1.20569	14	1725	2380	9.4	16	12	12	12	1	7	8	8	201	1	1	354	1	1	0	1	0
46405	26	50	166	18.1449	1	1	30	8.2	9.89333	0.27	agonist	1.2065	13	1500	3762	9.8	15	15	14	14	1	8	5	5	207	1	1	390	1	1	1	0	0
21837	28	70	160	27.3438	0	5	65	8.97	10.8667	0.44	agonist	1.21145	26	6225	419	12	6	6	5	5	2	1	1	1	2	0	0	0	0	0	0	0	0
43755	27	86	162	32.7694	1	4	35	6.02	7.30667	0.36	agonist	1.21373	12	2625	1565.7	9.2	13	11	9	8	1	3	1	1	177	1	1	403	1	1	0	1	0
44194	35	57	156	23.4221	1	1	29	6.21	7.56	0.29	agonist	1.21739	13	2025	2841.2	9.5	16	14	12	12	1	4	0	0	113	1	1	394	1	1	0	1	0
20657	28.6	26.3	26.3	26.3	0	3	48	8.3	10.1067		agonist	1.21767	10	2250	461	9	9	8	6	5	2	3	4	2	533	1	1	39+4	1	1	0	1	0
26852	33	49	160	19.1406	1	3	42	7.67	9.34667	0.34	agonist	1.2186	13	1425	2162	11.7	9	9	3	3	1	1	1	1	620	1	1	391	1	1	1	0	0
42125	26	70	162	26.6728	0	2	38	5.9	7.2		agonist	1.22034	16	2437.5	3456	10.9	20	18	16	14	1	8	7	7	703	1	1	392	1	1	0	1	0
41907	33	60	156	24.6548	1	10	46	7.33	8.97333	0.36	agonist	1.22419	17	2737.5	2513	11.4	8	7	6	5	1	4	3	3	84	1	1	0	0	0	0	0	0
45975	28	46	157	18.662	0	1	51	8.71	10.68	0.29	agonist	1.22618	11	2650	6743	10.3	18	17	12	12	1	7	9	9	2	0	0	0	0	0	0	0	0
42449	27	65	163	24.4646	1	4	64	6.01	7.4	0.29	agonist	1.23128	16	2125	2247	11.7	23	20	14	13	1	8	4	3	316	1	2	240	1	2	2	0	0
47645	30	57	152	24.6711	0	5		7.85	9.70667	0.3	agonist	1.23652	12	1350	2759	10.6	10	8	5	4	1	2	1	1	192	1	1	393	1	1	0	1	0
12914	30	58	169	20.3074	0	3	40	4.92	6.10667	0.34	agonist	1.24119	11	1425	3894	11.1	15	15	13	13	2	8	8	8	816	2	2	374	1	2	1	1	0
44898	26	57	168	20.1956	1	1	50	4.66	5.8	0.69	agonist	1.24464	10	1275	3288	9.5	14	12	10	10	1	5	5	5	305	1	1	353	1	1	1	0	0
39355	28	53	162	20.1951	0	4	29	5.72	7.14667	0.31	agonist	1.24942	13	2250	3180	12.3	14	12	7	7	1	2	3	3	275	1	1	403	1	1	1	0	0
37725	32	58	156	23.833	0	6	62	5.97	7.46667	0.33	agonist	1.2507	14	2225	2891.8	9.9	26	24	24	24	1	14	7	7	16	0	0	0	0	0	0	0	0
19197	30.5	19.57	19.57	19.57	0	4	40	5.96	7.48		agonist	1.25503	9	1200	2173	7	10	10	9	9	2	2	5	3	2	0	0	0	0	0	0	0	0
44515	25	52	157	21.0962	1	2	43	5.57	7	0.29	agonist	1.25673	9	862.5		11.5	22	13	10	9	1	2	4	4	109	1	1	0	0	0	0	0	0
22029	28	73	158	29.2421	1	2	48	6.26	7.88	0.45	agonist	1.25879	14	2137.5	351	11.6	16	12	12	12	1	1	3	3	406	1	1	392	1	1	0	1	0
42798	33	62	158	24.8358	0	1	70	5.55	6.98667	0.24	agonist	1.25886	12	1537.5	2798	13.3	13	12	9	9	1	4	6	6	2	0	0	0	0	0	0	0	0
37608	28	70	162	26.6728	0	4	20	5.8	7.30667		agonist	1.25977	19	3825	2659	12.5	14	14	14	13	1	6	8	8	176	1	1	391	1	1	1	0	0
42413	26	67	163	25.2174	1	1	46	6.18	7.78667	0.18	agonist	1.25998	10	1575	1267	12.4	7	7	5	5	1	1	2	1	13	0	0	0	0	0	0	0	0
25123	31	79	160	30.8594	0	4		8.03	10.12	0.58	agonist	1.26027	14	2950	777	9.8	6	6	6	6	1	5	5	5	2927	1	1	401	1	1	0	1	0
21500	35	21.26	21.26	21.26	0	5	36	6.53	8.34667		agonist	1.2782	9	1950	1240	12.3	15	11	9	8	2	0	3	0	2	0	0	0	0	0	0	0	0
21145	25.4	28.89	28.89	28.89	0	2	29	6.56	8.38667		agonist	1.27846	12	1313	1864	12.4	12	12	10	10	2	6	4	3	201	0	0	0	0	0	0	0	0
42740	31	60	163	22.5827	1	3	38	5.8	7.42667	0.17	agonist	1.28046	14	1750	4027	10.4	14	14	12	12	1	6	5	5	2	0	0	0	0	0	0	0	0
43670	40	55	155	22.8928	1	3	55	8.33	10.68	0.44	agonist	1.28211	12	1500	974	11.4	11	10	8	8	1	5	3	3	290	1	1	391	1	1	0	1	0
21711	28	48	155	19.9792	0	1	30	6.26	8.02667	0.83	agonist	1.28222	9	1800	3933	13.1	29	21	15	14	1	4	4	4	819	1	1	394	1	1	1	0	1
25431	29	56	155	23.3091	0	4	49	7.36	9.46667	0.57	agonist	1.28623	15	2137.5	1081	14	5	5	3	3	2	1	1	0	1200	2	2	374	1	2	1	1	0
46537	35	69	163	25.9701	1	8	38	8.06	10.4	0.33	agonist	1.29032	12	2025	2450	11	12	11	10	10	1	7	5	4	5	0	0	0	0	0	0	0	0
17206	29	19.72	19.72	19.72	0	2	55	6.5	8.41333		agonist	1.29436	9	975	1758	12.8	18	14	10	9	2	4	2	1	705	1	1	40+0	1	1	1	0	0
43465	31	60	158	24.0346	0	3	51	7.24	9.37333	0.28	agonist	1.29466	12	1273.5	1088	12.2	5	4	4	4	1	1	1	0	2	0	0	0	0	0	0	0	0
41946	26	66	170	22.8374	0	5	37	5.77	7.48	0.34	agonist	1.29636	12	1700	1539.9	12.7	13	13	13	13	1	6	2	2	310	1	1	404	1	1	0	1	0
22384	27	42	158	16.8242	0	3	30	8.2	10.64	0.5	agonist	1.29756	9	1050	3087	8.2	18	18	18	18	2	2	1	0	2	0	0	0	0	0	0	0	0
22809	29	55	160	21.4844	0	5	40	4.37	5.68	0.41	agonist	1.29977	11	1275	1481	10.9	14	14	12	12	1	4	5	4	85	0	0	0	0	0	0	0	0
25244	30	50	160	19.5312	1	1	37	6.84	8.92		agonist	1.30409	12	2250	2941	12.5	23	23	20	20	1	12	9	9	2	0	0	0	0	0	0	0	0
41406	26	57	165	20.9366	1	7	38	6.44	8.4	0.32	agonist	1.30435	11	1075	27770	8.7	13	12	9	9	1	5	3	2	322	1	1	356	1	1	0	1	0
24272	28	45	150	20	0	6	68	6	7.82667	0.7	agonist	1.30444	12	2025	3962	11.8	14	10	10	10	2	5	4	2	56	0	0	0	0	0	0	0	0
21796	27	50	160	19.5312	0	2	36	6.42	8.38667	0.58	agonist	1.30633	11	1800	2846	11.1	15	12	12	12	2	6	5	3	1770	2	2	421	1	2	1	1	0
21604	27	62	160	24.2188	1	1	38	6.9	9.06667		agonist	1.31401	16	2100	1096	6.9	6	4	4	4	2	2	3	3	1542	2	2	380	1	2	1	1	0
43410	26	47	158	18.8271	0	5	40	6.51	8.57333	0.38	agonist	1.31695	12	1300	2374	10.5	13	11	7	7	1	5	6	6	42	0	0	0	0	0	0	0	0
43872	30	45	153	19.2234	0	6	55	6.45	8.53333	0.17	agonist	1.323	11	1875	1094	14.6	10	9	8	8	1	4	6	6	44	0	0	0	0	0	0	0	0
25878	30	80	166	29.0318	1	2	50	5.42	7.18667	0.45	agonist	1.32595	12	2025	890	6.5	9	9	6	6	1	3	5	5	148	1	1	391	1	1	0	1	0
43638	32	56	160	21.875	0	4	45	6.2	8.22667	0.39	agonist	1.32688	13	1650	4742	11.8	20	19	14	13	1	10	11	11	119	1	1	382	1	1	1	0	0
24312	27	55	168	19.487	0	3	39	7.34	9.8	0.51	agonist	1.33515	17	2175	1535	10.4	7	6	4	4	2	0	1	0	5	0	0	0	0	0	0	0	0
25640	25	51	160	19.9219	0	4	35	6.13	8.2	0.5	agonist	1.33768	15	2325	902	10.8	5	5	3	3	1	2	2	2	224	0	0	0	0	0	0	0	0
42334	29	54	163	20.3244	1	1	29	7.59	10.1867	0.48	agonist	1.34212	11	950	2431.1	12.7	11	11	11	11	1	6	3	3	34	0	0	0	0	0	0	0	0
37212	32	64	165	23.5078	1	5	70	7.06	9.48	0.38	agonist	1.34278	9	1350	1491	10.7	19	18	16	16	1	2	4	4	587	1	1	382	1	1	0	1	0
26646	30	46	160	17.9688	1	7	52	6.57	8.82667	0.51	agonist	1.34348	11	1325	2828	9	6	6	6	6	2	3	3	1	2	0	0	0	0	0	0	0	0
42737	33	62	154	26.1427	0	8		9.6	12.9467	0.25	agonist	1.34861	14	2625	4494	10.3	19	18	17	17	1	7	6	6	217	1	1	405	1	1	1	0	0
44434	34	50	155	20.8117	1	2	37	5.4	7.30667		agonist	1.35309	11	1725	3781.6	12.7	21	16	10	10	1	2	1	1	172	1	1	383	1	1	0	1	0
45685	27	67	161	25.8478	0	3	47	9.1	12.32	0.43	agonist	1.35385	16	3325	679.5	13.5	10	9	8	8	1	2	1	1	113	1	1	392	1	1	1	0	0
48206	26	46	158	18.4265	1	1	33	9.02	12.2133	0.31	agonist	1.35403	14	1300	2940	8.4	11	10	9	9	1	8	4	4	476	1	1	416	1	1	0	1	0
43685	32	50	160	19.5312	0	5	42	8.79	11.9333	0.32	agonist	1.3576	9	1200	2604	12.5	14	14	10	10	1	6	5	5	1700	1	1	372	1	1	0	1	0
18519	27.9	18.34	18.34	18.34	0	3	56	8.14	11.0933		agonist	1.36282	10	1125	2066	12.6	24	23	20	19	1	8	3	2	1	0	0	0	0	0	0	0	0
15593	28	85	163	31.9922	1	2	41	4.87	6.64	0.47	agonist	1.36345	16	2700	2238	7.5	9	4	2	2	2	1	2	0	2	1	0	371	0	0	0	0	0
22824	27	46	158	18.4265	1	1	42	7.35	10.04	0.61	agonist	1.36599	20	2550	417	9.8	6	6	4	4	2	0	3	0	770	2	2	280	1	2	0	2	0
22632	26	47	153	20.0777	0	1	34	4.23	5.8		agonist	1.37116	9	900	3841	11.7	17	14	10	10	2	4	1	0	766	2	2	414	1	2	2	0	0
44547	34	73	161	28.1625	1	4	61	3.4	4.66667	0.41	agonist	1.37255	14	2625	3240	14.1	27	25	19	19	1	11	8	8	314	1	1	392	1	1	1	0	0
26519	30	76	159	30.0621	1	2	43	4.47	6.14667	0.64	agonist	1.37509	12	1650	1802	8.4	9	8	5	5	1	3	4	4	2	0	0	0	0	0	0	0	0
38207	25	52	148	23.74	1	5	36	5.2	7.16	0.37	agonist	1.37692	12	1500	2958	8.4	17	17	15	15	1	10	7	7	163	1	0	0	0	0	0	0	0
22209	30	51	159	20.1733	0	2	46	7.53	10.44	0.51	agonist	1.38645	10	1612.5	1330	10.3	14	11	10	10	2	2	4	2	2	0	0	0	0	0	0	0	0
38423	29	59	163	22.2063	0	6	51	5.16	7.16	0.31	agonist	1.3876	15	1737.5	717	10.6	16	7	6	6	1	3	4	4	330	1	1	24+0	1	0	0	0	0
25768	33	60	165	22.0386	1	1	67	6.74	9.44	0.58	agonist	1.40059	11	1575	2372	12.9	14	13	12	11	1	9	8	8	2106	1	1	23+	0	0	0	0	0
41085	29	78	168	27.6361	0	5		5.04	7.06667		agonist	1.40212	10	1350	1434	11.9	35	28	11	11	1	2	6	5	2	0	0	0	0	0	0	0	0
23909	25	68	158	27.2392	0	3	66	7.52	10.56	0.25	agonist	1.40426	25	5062.5	1162	9	11	9	6	6	1	2	5	5	750	1	1	28+4	0	0	0	0	0
22417	28	50	163	18.8189	0	1	47	8.52	12.0533	0.55	agonist	1.41471	9	1350	545	14.2	10	9	8	8	2	5	4	2	2	0	0	0	0	0	0	0	0
39257	26	60	155	24.974	0	2	35	7.32	10.36	0.1	agonist	1.4153	12	2250	2107.3	9.5	21	19	18	18	1	6	6	6	74	0	0	0	0	0	0	0	0
29145	29	65	153	27.7671	1	5	36	7.68	10.8933	0.12	agonist	1.4184	11	2000	2171	9.9	16	13	12	12	1	4	7	7	69	1	1	0	0	0	0	0	0
42019	31	70	155	29.1363	1	10	43	8.13	11.6133	0.2	agonist	1.42845	15	3825	2882.7	9.4	19	19	14	14	1	7	4	4	256	2	2	23+	0	0	0	0	0
39376	33	89	170	30.7958	1	3		6.79	9.77333	0.83	agonist	1.43937	11	2250	2031	10.1	9	9	7	7	2	1	5	5	468	1	1	394	0	0	0	0	0
43197	25	48	158	19.2277	0	1	50	6.71	9.66667	0.29	agonist	1.44064	15	1750	2280	8.5	11	11	6	6	1	2	8	8	180	1	1	391	1	1	0	1	0
23863	31	70	166	25.4028	0	3	51	5.86	8.45333	0.39	agonist	1.44255	12	1275	1996	10.4	10	5	4	4	2	1	0	0	231	1	1	394	1	1	0	1	0
42968	33	55	138	28.8805	1	4	40	5.47	7.89333	0.59	agonist	1.44302	10	975	3195.9	10.2	19	19	15	15	1	6	8	8	281	1	0	0	0	0	0	0	0
23525	23	80	158	32.0461	0	6	59	9.44	13.6533	0.24	agonist	1.44633	16	2400	1629	10.2	11	9	7	7	2	3	1	0	112	1	1	385	1	1	1	0	0
39569	27	56	164	20.8209	0	4	63	6.8	9.84	0.61	agonist	1.44706	13	1700	3996	11.2	27	22	22	22	1	8	9	9	347	1	1	370	1	1	1	0	0
45171	27	50	164	18.5901	1	3	59	7.72	11.1733	0.37	agonist	1.44732	13	1575	3861	9.2	13	12	12	12	1	9	10	9	270	1	1	384	1	1	0	1	0
21565	24	82	160	32.0312	1	1	32	8.65	12.52		agonist	1.4474	19	4275	340	10	3	3	2	2	2	0	1	0	122	1	1	0	0	0	0	0	0
40152	27	70	157	28.3987	0	5	65	6.09	8.82667	0.39	agonist	1.44937	11	1575	2660	11.3	27	15	9	7	1	2	2	2	31	0	0	0	0	0	0	0	0
43043	32	58	158	23.2335	1	5	50	6.66	9.69333	0.3	agonist	1.45546	17	2325	2907	10.7	20	19	16	16	1	6	5	5	157	1	1	0	0	0	0	0	0
24550	27	53	154	22.3478	1	1	38	9.81	14.2933	0.66	agonist	1.45702	13	1837.5	2576	10.7	16	15	11	10	1	3	4	4	1362	1	1	383	1	1	0	1	0
17611	31	65	159	25.711	1	4		6.38	9.32	0.37	agonist	1.46082	12	2925	1117.7	12	15	12	10	9	1	3	1	1	163	1	1	393	1	1	0	1	0
45098	32	62	160	24.2188	0	3	36	7.41	10.88	0.26	agonist	1.46829	15	2887.5	1019	12.2	13	13	12	12	1	9	8	8	165	1	1	366	1	1	0	1	0
37863	25	69	160	26.9531	0	7	58	7.31	10.7333	0.32	agonist	1.46831	15	2250	852	10.6	10	9	9	9	1	4	2	2	113	1	1	384	1	1	1	0	0
45725	28	69	158	27.6398	1	5		6	8.82667	0.33	agonist	1.47111	11	2250	1045	10.4	6	5	4	4	1	2	2	2	52	0	0	0	0	0	0	0	0
43183	30	51	160	19.9219	0	3	51	6.14	9.09333	0.42	agonist	1.481	16	1937.5	2797.7	8.8	6	6	6	6	1	2	3	2	2	0	0	0	0	0	0	0	0
44968	22	55	158	22.0317	1	3	43	5.91	8.76	0.35	agonist	1.48223	11	1237.5	5550.6	10.9	17	16	15	14	1	6	4	4	444	1	1	0	0	0	0	0	0
45978	31	74	163	27.852	1	2	22	6.76	10.0267		agonist	1.48323	18	2950	1602	6.3	9	6	3	3	1	0	1	0	2	0	0	0	0	0	0	0	0
25385	27	50	155	20.8117	0	9	50	5.85	8.68	0.56	agonist	1.48376	10	875	2585	11.1	9	9	9	9	2	0	5	5	2	0	0	0	0	0	0	0	0
22390	25	49	160	19.1406	0	2	31	6.53	9.69333	0.54	agonist	1.48443	12	1125	1838	9.1	17	15	12	12	2	3	1	1	14	0	0	0	0	0	0	0	0
24747	27	65	160	25.3906	0	10	37	8.01	11.92	0.72	agonist	1.48814	9	1700	1842	12.4	17	12	8	8	1	4	2	2	2	0	0	0	0	0	0	0	0
48146	25	77	161	29.7056	0	4	51	5.29	7.88	0.49	agonist	1.4896	16	2850	2713	10.3	19	19	18	18	1	7	4	3	176	1	1	373	1	1	1	0	0
41862	32	50	160	19.5312	0	7	28	11.43	17.0667	0.83	agonist	1.49315	14	1650	1437	12.6	2	2	2	2	1	1	1	1	199	1	1	393	1	1	0	1	0
42932	32	80	173	26.7299	0	3	70	5.12	7.65333	0.46	agonist	1.49479	12	2250	1347.4	9.7	9	6	5	5	1	1	1	1	521	1	1	393	1	1	0	1	0
45022	26	70	162	26.6728	0	3	59	4.93	7.38667	0.44	agonist	1.49831	18	2775	2026	12.1	26	23	22	21	1	10	11	11	161	1	1	392	1	1	0	1	0
45839	22	70	155	29.1363	0	2	40	7.61	11.4267	0.34	agonist	1.50153	17	3975	1624	10.2	26	19	15	14	1	6	6	5	1	0	0	0	0	0	0	0	0
46298	32	51	155	21.2279	0	5	55	6.98	10.4933	0.67	agonist	1.50334	14	2250	922.1	12	10	9	5	5	1	0	2	0	131	1	1	395	1	1	1	0	0
38410	30	57	152	24.6711	1	6	39	8.69	13.08	0.54	agonist	1.50518	11	2512.5	3204	11.2	18	16	8	7	1	5	5	5	17	0	0	0	0	0	0	0	0
40434	30	64	164	23.7954	1	2	60	6.61	9.96	0.44	agonist	1.50681	11	1925	2565	13	15	14	13	12	1	6	7	6	178	1	0	0	0	0	0	0	0
47780	28	50	157	20.2848	0	3	43	4.15	6.26667	0.28	agonist	1.51004	9	1021.4	2714	12.6	20	15	12	10	1	1	5	5	2	0	0	0	0	0	0	0	0
22508	32	84	158	33.6485	1	4	42	6.33	9.58667	0.57	agonist	1.51448	15	2700	1049	11.8	6	5	4	4	2	0	2	0	85	2	2	370	1	2	1	1	0
40625	26	69	153	29.4758	0	4		7.3	11.1067	0.33	agonist	1.52146	11	2325	3309.5	11.4	13	9	8	8	1	6	4	4	1	0	0	0	0	0	0	0	0
39309	28	52	160	20.3125	1	1	36	6.42	9.84	0.41	agonist	1.53271	12	1575	2265	7.8	23	20	18	18	1	14	12	12	500	2	2	384	1	1	1	0	0
45217	26	46	152	19.91	0	4	62	8	12.2667	0.42	agonist	1.53333	14	2175	2937	11.4	27	27	24	21	1	12	13	12	176	0	0	0	0	0	0	0	0
28214	37	63	160	24.6094	1	2		4.23	6.56	0.22	agonist	1.55083	10	1500	861	12.3	7	7	6	6	1	4	3	3	138	1	1	390	1	1	1	0	0
44754	34	55	155	22.8928	0	1	62	6.65	10.3733	0.4	agonist	1.5599	15	1800	2202	10	15	10	7	7	1	3	6	6	447	1	1	386	1	1	1	0	0
41447	26	59	160	23.0469	1	2	28	5.13	8.01333	0.35	agonist	1.56205	14	1700	4362	14.3	15	15	14	14	1	2	4	4	71	0	0	0	0	0	0	0	0
29145	28	65	153	27.7671	1	5	67	8.34	13.0667		agonist	1.56675	12	1800	2171	9.9	5	3	1	1	1	0	0	0	2	0	0	0	0	0	0	0	0
39023	29	57	150	25.3333	0	6	29	7.36	11.5467	0.32	agonist	1.56884	10	1650	1766.3	12.3	17	16	14	14	1	6	2	2	427	1	1	405	1	1	0	1	0
36833	27	49	166	17.782	0	1	51	6.23	9.78667	0.36	agonist	1.57089	11	900	4704	10	22	21	16	16	1	9	6	5	91	1	1	385	1	1	1	0	0
47378	27	73	165	26.8136	0	7	46	6.54	10.2933	0.35	agonist	1.5739	13	2250	1312.8	11.3	6	5	3	3	1	2	3	3	83	1	1	382	1	1	1	0	0
20595	29.4	24.44	24.44	24.44	0	3	39	7.56	11.9733		agonist	1.58377	21	3150	1301	11.3	14	12	7	6	2	2	5	3	137	1	1	26+6	0	0	0	0	0
18057	29.1	22.06	22.06	22.06	1	5	68	4.81	7.62667		agonist	1.58559	10	2175	1726	7.7	17	13	11	11	1	4	6	4	2	0	0	0	0	0	0	0	0
43599	28	60	158	24.0346	1	1	36	6.81	10.8	0.47	agonist	1.5859	11	1300	0	10.6	9	9			1		5	5	2	0	0	0	0	0	0	0	0
42113	28	60	155	24.974	0	3		7.3	11.6		agonist	1.58904	13	1800	1337	11	9	9	6	6	1	2	0	0	641	1	1	402	1	1	1	0	0
24216	25	55	160	21.4844	0	2	35	4.25	6.76	0.34	agonist	1.59059	9	1050	2826	12.6	10	10	9	9	2	4	4	2	7	1	1	410	0	0	0	0	0
35720	27	45	162	17.1468	1	2	38	3.94	6.30667	0.2	agonist	1.60068	17	1600	3232.6	10	11	11			1		4	4	281	1	1	394	1	1	1	0	0
24472	34	55	152	23.8054	1	2	29	5.91	9.46667	0.2	agonist	1.6018	13	1462.5	3362	12.4	17	17	13	13	1	9	6	6	791	1	1	352	1	1	1	0	0
26765	28	44	162	16.7657	1	1	60	4.97	8	0.6	agonist	1.60966	8	1200	2708	12.9	11	11	7	7	2	3	5	5	423	2	1	391	1	1	0	1	0
42059	27	57	168	20.1956	1	2	60	8.94	14.4	0.45	agonist	1.61074	12	1100	1540	11.2	15	15	15	14	1	2	2	2	611	1	1	390	1	1	0	1	0
42184	27	49	167	17.5697	1	2	46	9.39	15.1733	0.31	agonist	1.6159	15	1787.5	5439	10	18	18	17	17	1	12	7	7	41	0	0	0	0	0	0	0	0
23825	27	43	156	17.6693	1	1	43	5.86	9.49333	0.74	agonist	1.62002	16	2100	2455	9.5	18	18	14	14	1	12	7	7	1983	1	2	360	1	2	0	2	0
46605	26	57	162	21.7193	0	2	67	5.29	8.57333	0.27	agonist	1.62067	15	1700	2170	13.1	16	15	14	14	1	7	7	7	2	0	0	0	0	0	0	0	0
16451	26.5	25.39	25.39	25.39	0	8	80	3.08	5		agonist	1.62338	7	638	2097	12.1	13	9	6	6	2	0	2	0	2	0	0	0	0	0	0	0	0
40188	25	59	157	23.9361	1	3	40	5.74	9.33333	0.59	agonist	1.62602	10	1725.1	1896.4	11.4	16	16	12	12	1	2	6	6	144	1	1	390	1	1	0	1	0
10323	31.4	28.89	28.89	28.89	0	8	59	7.28	11.8667		agonist	1.63004	16	2475	587	8	7	6	4	3	1	0	1	0	2	0	0	0	0	0	0	0	0
23522	25	55	151	24.1217	0	5	45	9.36	15.2667	0.47	agonist	1.63105	9	900	2000	9.6	8	8	6	6	1	5	5	5	20	0	0	0	0	0	0	0	0
42200	27	64	162	24.3865	1	2	40	5.08	8.30667	0.15	agonist	1.63517	9	800	1704	10	15	11	7	7	1	3	5	5	355	1	1	401	1	1	0	1	0
22045	24	51	160	19.9219	1	1	74	6.73	11.0267	0.81	agonist	1.63843	11	975	5402	7.4	13	10	9	9	1	5	6	6	96	0	0	0	0	0	0	0	0
39695	28	70	165	25.7117	1	1	49	6.85	11.2267	0.48	agonist	1.63893	11	2400	2936	11	23	22	16	16	1	6	6	6	243	1	1	403	1	1	1	0	0
44852	37	64	152	27.7008	0	3	29	6.51	10.68	0.5	agonist	1.64055	14	2550	475	13.7	8	8	7	7	1	2	2	2	656	1	1	393	1	1	1	0	0
25469	31	68	160	26.5625	0	5	48	4.79	7.86667		agonist	1.64231	16	2250	1447	11.3	6	6	5	4	2	0	0	0	2	0	0	0	0	0	0	0	0
22871	36	52	158	20.83	1	3	43	16.95	28.0533	0.44	agonist	1.65506	11	1387.5	1000	9.9	8	6	3	3	2	0	3	0	131	0	0	0	0	0	0	0	0
38362	24	57	160	22.2656	0	3	33	5.96	9.89333	0.6	agonist	1.65996	12	1212.5	3060	11.4	10	9	8	8	1	1	5	5	523	1	1	401	1	1	0	1	0
21450	27.2	20.4	20.4	20.4	0	2	48	5.14	8.53333		agonist	1.66018	11	1500	4871	11.8	19	19	15	15	2	3	5	3	96	1	1	41+1	1	1	1	0	0
38533	25	57	160	22.2656	0	1	26	4.57	7.61333	0.52	agonist	1.66594	14	1775	1812	10.5	9	9	7	7	2	3	2	2	172	2	2	341	1	2	2	0	0
26483	29	52	160	20.3125	1	4	49	6.12	10.2	0.46	agonist	1.66667	11	1350	1000	9	8	8	8	8	1	0	1	1	2	0	0	0	0	0	0	0	0
37474	24	62	154	26.1427	1	3		6.49	10.8533	0.51	agonist	1.67232	17	1675	568	11.3	2	2	2	2	2	0	0	0	266	1	1	396	1	1	0	1	0
25671	28	65	160	25.3906	1	5	39	5.14	8.6	0.43	agonist	1.67315	18	3275	1996	11.4	15	15	15	15	1	9	8	8	926	1	0	0	0	0	0	0	0
18469	26	19.23	19.23	19.23	0	2	37	6.26	10.5067		agonist	1.67838	18	2300	2084	12	10	9	9	9	2	2	3	0	482	1	1	36+3	1	1	1	0	0
38322	25	57	156	23.4221	1	1		6.54	10.9867	0.34	agonist	1.67992	12	1275	2778	10.2	20	14	10	10	1	3	4	4	582	1	1	395	1	1	1	0	0
47665	32	52	158	20.83	0	3	22	10.63	17.9867	0.2	agonist	1.69207	9	875	2706	12.5	8	6	6	6	1	3	3	3	51	0	0	0	0	0	0	0	0
39500	32	64	158	25.6369	1	2	40	5.9	10.0533	0.33	agonist	1.70395	9	2100	1583.5	8	15	10	8	8	1	0	2	2	2	0	0	0	0	0	0	0	0
26073	31	54	160	21.0938	1	2	41	5.76	9.85333	0.6	agonist	1.71065	9	1800	1789	9	13	12	11	11	1	7	8	8	1619	1	1	372	1	1	1	0	0
19799	31	44	158	17.6254	0	3	48	5.17	8.97333	0.33	agonist	1.73565	10	1050	1878	15	8	8	6	6	1	3	3	3	40	0	0	0	0	0	0	0	0
46782	32	65	146	30.4935	1	3		5.67	9.88	0.33	agonist	1.7425	14	2700	2397	12.1	17	17	15	13	1	8	9	9	148	1	0	0	0	0	0	0	0
45660	37	76	160	29.6875	1	2	64	5.36	9.36	0.46	agonist	1.74627	11	2025	2712	10	13	12	9	9	1	4	4	4	327	1	1	376	1	1	1	0	0
38220	29	36	152	15.5817	1	1	43	4.6	8.04	0.24	agonist	1.74783	11	975.2	4393	12.7	12	10	9	9	1	4	4	4	509	1	1	374	1	1	1	0	0
26569	32	63	165	23.1405	1	3	33	7.82	13.72	0.45	agonist	1.75448	10	1237.5	2758	8	13	12	6	6	1	3	2	2	634	1	2	360	1	1	0	1	0
38904	27	80	170	27.6817	1	3	45	2.9	5.10667		agonist	1.76092	14	2250	1763	7.8	13	11	9	9	1	1	4	4	9	0	0	0	0	0	0	0	0
22313	28	50	160	19.5312	1	2	26	5.3	9.33333	0.95	agonist	1.76101	10	975	4847	11.4	16	16	14	14	2	6	10	10	748	1	1	0	0	0	0	0	0
44030	25	64	160	25	1	6	64	3.78	6.66667	0.39	agonist	1.76367	15	2962.5	2027	9.5	17	16	12	11	1	3	4	4	2	0	0	0	0	0	0	0	0
42215	27	69	178	21.7776	0	6	54	6.37	11.3067	0.34	agonist	1.77499	12	1425	994	13.7	11	11	10	10	1	2	1	1	103	1	1	386	1	1	1	0	0
42632	34	68	160	26.5625	0	12	37	5.94	10.5733	0.23	agonist	1.78002	11	1725	4030	16	21	21	16	15	1	10	5	4	10	0	0	0	0	0	0	0	0
20096	32	27.41	27.41	27.41	1	4	54	7.17	12.8133		agonist	1.78708	17	2138	1589	11.9	8	7	5	5	2	1	2	0	788	1	1	38+1	1	1	1	0	0
16262	28.4	27.47	27.47	27.47	0	3	45	5.37	9.62667		agonist	1.79268	10	1163	1241	11	12	12	9	9	2	0	0	0	2	0	0	0	0	0	0	0	0
36642	30	54	159	21.3599	1	1	38	7.12	12.8133	0.44	agonist	1.79963	22	3075	534	7.4	7	7	6	6	1	4	5	4	149	1	1	401	1	1	0	1	0
42721	32	59	153	25.204	1	5	54	6.62	11.9333	0.27	agonist	1.80262	10	1425	1059	11.6	16	15	11	11	1	7	9	8	349	1	1	395	1	1	1	0	0
43444	32	72	160	28.125	1	2		7.93	14.32	0.76	agonist	1.8058	17	2700	3106	10.5	22	22	21	20	1	4	5	4	215	1	0	0	0	0	0	0	0
45398	32	70	162	26.6728	0	6	29	4.78	8.65333	0.24	agonist	1.81032	18	3200	2852	13.6	21	20	17	16	1	7	4	3	142	1	1	396	1	1	0	1	0
18795	26.1	25.39	25.39	25.39	0	2	45	7.01	12.72		agonist	1.81455	13	1625	480	10	6	5	2	2	2	0	2	0	490	2	2	34+1	1	2	0	2	0
41624	33	50	152	21.6413	1	3	40	8.05	14.6133		agonist	1.81532	13	1875	2995	10.6	12	12	12	11	1	5	5	5	404	1	1	390	1	1	1	0	0
18866	29.5	22.31	22.31	22.31	1	1	70	5.48	9.96		agonist	1.81752	11	1200	2679	10.9	20	20	15	15	1	12	11	8	2	0	0	0	0	0	0	0	0
36778	28	58	158	23.2335	1	3	69	6.65	12.1867	0.36	agonist	1.83258	11	1575	1628	9.5	7	7	7	7	1	2	1	0	135	1	1	363	1	1	1	0	0
37496	30	47	165	17.2635	1	3	55	8.76	16.16	0.22	agonist	1.84475	13	1400	1826	10.6	15	14	12	11	2	4	5	5	2	0	0	0	0	0	0	0	0
17970	29	65	165	23.8751	1	1	47	5.27	9.82667		agonist	1.86464	14	3075	3698	9.8	13	10	10	10	2	3	8	8	1616	1	1	385	1	1	1	0	0
17603	29	56	158	22.4323	1	3	51	7.92	14.7733	0.34	agonist	1.86532	11	1200	2628	13.8	24	20	17	17	1	8	10	9	244	1	1	0	0	0	0	0	0
20702	29.3	24.44	24.44	24.44	0	3	69	8.03	15.0533		agonist	1.87464	9	1350	2890	13.5	20	16	10	10	1	2	7	7	448	1	1	38+4	1	1	1	0	0
41911	28	54	160	21.0938	1	1	26	4.72	8.85333	0.32	agonist	1.87571	11	1162.5	4883	10.5	12	11	9	8	1	4	4	4	6	0	0	0	0	0	0	0	0
37757	31	52	163	19.5717	0	3	39	5.79	10.92	0.29	agonist	1.88601	11	962.5	2054	11.3	13	11	8	8	1	6	1	1	634	1	1	396	1	1	1	0	0
25301	26	45	158	18.026	0	3	73	4.37	8.25333	0.52	agonist	1.88863	13	1650	2985	7.5	21	18	12	10	1	3	2	2	690	1	1	406	1	1	0	1	0
24339	23	49	158	19.6283	0	4	47	5.09	9.68	0.82	agonist	1.90177	13	1200	4057	11.3	8	6	4	4	2	1	2	2	7	0	0	0	0	0	0	0	0
6169	32	48	160	18.75	1	9	97	9.49	18.08	0.75	agonist	1.90516	11	2700	3600	7.6	11	10	6	6	2	2	2	0	2	0	0	0	0	0	0	0	0
37226	30	72	160	28.125	1	2	39	6.22	11.88	0.27	agonist	1.90997	14	1475	1937	10.8	16	16	15	15	1	8	8	8	165	1	1	0	0	0	0	0	0
23746	32	57	156	23.4221	1	3	51	5.27	10.12	0.58	agonist	1.9203	7	675		12.7	16	11	10	10	1	2	4	4	1058	1	2	22+	0	0	0	0	0
47254	27	59	152	25.5367	1	4		7.18	13.8133	0.57	agonist	1.92386	10	1500	2956	9.3	24	19	10	7	1	4	3	3	41	1	0	0	0	0	0	0	0
41991	29	58	168	20.5499	1	4	50	5.97	11.52	0.41	agonist	1.92965	10	1875	3524.4	9.2	20	17	13	11	1	2	5	5	161	1	1	374	1	1	0	1	0
44398	30	65	160	25.3906	0	1	51	6.29	12.1733	0.31	agonist	1.93535	12	1175	2984	10.2	14	10	9	8	1	1	1	1	2	0	0	0	0	0	0	0	0
44398	30	65	160	25.3906	0	1	40	6.29	12.1733	0.31	agonist	1.93535	18	3150	2468	10.1	18	12	9	9	1	0	2	2	2	0	0	0	0	0	0	0	0
40284	27	55	163	20.7008	0	4	49	5.07	9.90667	0.27	agonist	1.95398	11	1050	1025	12.1	14	12	10	10	1	6	2	2	337	1	1	411	1	1	1	0	0
22479	29	62	158	24.8358	1	1	45	6.43	12.5733	0.65	agonist	1.95542	10	1100	1479	11.4	7	6	5	5	2	3	3	1	1145	2	2	394	1	1	1	0	0
9876	37	69	160	26.9531	1	6	45	4.89	9.66667	0.26	agonist	1.97682	11	2025	2441	10.9	11	8	8	8	1	4	1	1	269	1	1	372	1	1	0	1	0
22393	30	49	163	18.4425	1	3	50	5.18	10.2933	0.57	agonist	1.98713	10	900	2800	10.6	23	23	20	20	1	6	7	7	268	1	1	405	1	1	0	1	0
40077	23	49	160	19.1406	0	2	70	6.24	12.4	0.28	agonist	1.98718	11	1125	3005.6	13.4	20	17	14	14	1	6	5	5	27	0	0	0	0	0	0	0	0
21197	25	48	155	19.9792	0	3	37	4.92	9.81333	0.77	agonist	1.99558	8	775	2499	12.8	19	19	11	11	1	9	5	5	172	1	1	351	1	1	1	0	0
46449	28	95	163	35.756	0	9		5.97	11.9867		agonist	2.00782	15	2850	6369	13.1	23	22	14	14	1	5	5	5	165	1	1	384	1	1	1	0	0
47542	32	55	150	24.4444	0	12	37	5.61	11.3333	0.24	agonist	2.0202	20	3300	2842	10.5	19	18	12	12	1	2	4	3	221	1	1	402	1	1	0	1	0
46819	26	55	167	19.721	1	8	39	5.61	11.36	0.34	agonist	2.02496	12	2475	3569.6	8.5	12	10	9	9	1	4	6	6	83	0	0	0	0	0	0	0	0
25848	25	50	156	20.5457	0	2	39	7.1	14.48	0.51	agonist	2.03944	11	1350	3272	8.8	17	15	10	9	1	4	2	2	2	1	1	352	0	0	0	0	0
40569	30	65	159	25.711	0	8	51	6.34	12.9467	0.48	agonist	2.04206	12	2700	1404.2	13.6	6	5	3	3	1	2	0	0	6	0	0	0	0	0	0	0	0
42462	33	75	160	29.2969	1	12	48	5.69	11.6667	0.37	agonist	2.05038	15	2587.5	629.7	8	6	6	5	5	1	2	3	2	274	1	1	0	0	0	0	0	0
41363	31	60	163	22.5827	1	5	42	5.45	11.2	0.51	agonist	2.05505	10	1500	2269.7	11.7	19	19	17	16	1	8	7	7	1000	1	1	411	1	1	1	0	0
45310	27	55	160	21.4844	0	2	40	8.7	18.0133	0.32	agonist	2.0705	16	2912.5	2685	10.1	21	21	17	17	1	10	5	4	606	1	1	396	1	1	1	0	0
41537	35	79	153	33.7477	1	6	48	8.25	17.24	0.47	agonist	2.0897	17	3750	1793	14.9	9	8	7	7	1	6	5	5	5	0	0	0	0	0	0	0	0
45410	35	44	153	18.7962	1	7	36	8.34	17.56	0.41	agonist	2.10552	13	1600	2945	12.9	39	28	25	22	1	4	6	6	47	0	0	0	0	0	0	0	0
43645	34	61	158	24.4352	0	5	36	3.84	8.12	0.3	agonist	2.11458	14	3200	1053	11.1	13	12	9	9	1	4	5	5	226	1	1	386	1	1	1	0	0
18571	30.3	28.34	28.34	28.34	0	2	48	3.97	8.41333		agonist	2.11923	16	3750	1340	10.2	7	7	5	5	2	1	4	2	585	2	2	28+5	1	2	0	2	0
48299	29	57	158	22.8329	1	8	52	5.26	11.16	0.23	agonist	2.12167	9	900	2458	11.9	12	7	6	6	1	0	2	2	241	1	1	344	1	1	1	0	0
40348	38	55	158	22.0317	1	5		4.84	10.2933	0.4	agonist	2.12672	11	1650	2015	11.5	14	14	13	13	2	0	0	0	2	0	0	0	0	0	0	0	0
40712	30	55	150	24.4444	1	4	70	2.03	4.32	0.4	agonist	2.12808	11	1350	1665	8.1	17	10	10	10	1	4	5	5	234	1	1	0	0	0	0	0	0
41953	28	56	160	21.875	0	5	41	6.32	13.5067	0.44	agonist	2.13713	12	1200	2602.6	10.1	12	9	6	5	1	3	1	1	84	1	0	0	0	0	0	0	0
48189	34	50	160	19.5312	1	4	39	4.78	10.24	0.24	agonist	2.14226	8	787.5	1904	6.8	23	21	20	19	1	12	6	6	90	1	1	386	1	1	1	0	0
17305	30.1	22.68	22.68	22.68	1	1	29	7.01	15.0667		agonist	2.14931	13	1300	1208	14.8	12	10	7	6	2	4	2	0	369	1	1	39+1	1	1	1	0	0
40253	28	47	160	18.3594	0	2	42	6.65	14.2933	0.24	agonist	2.14937	12	2025	2868	13.4	16	14	14	14	1	10	6	6	504	1	1	396	1	1	1	0	0
19558	23.8	21.21	21.21	21.21	0	2	59	7.97	17.1867		agonist	2.15642	9	1050	3400	11.9	24	22	18	18	1	14	11	9	2109	1	1	40+5	1	1	1	0	0
18115	30.3	20.32	20.32	20.32	0	3	50	7.95	17.2		agonist	2.16352	17	1675	588	12.2	3	3	3	3	2	0	1	0	251	1	1	36+3	1	1	1	0	0
19081	28	24.65	24.65	24.65	1	3	38	8.1	17.5333		agonist	2.16461	10	2100	1834	15.1	13	11	11	11	2	7	5	3	2	0	0	0	0	0	0	0	0
41928	31	51	160	19.9219	0	4	42	6.59	14.32		agonist	2.17299	11	1200	2808	11.7	14	13	7	7	1	4	3	3	26	0	0	0	0	0	0	0	0
22977	33	79	170	27.3356	0	4	53	9.09	20.1467	0.72	agonist	2.21635	15	2512.5	2340	11.9	18	18	13	13	1	8	8	8	248	1	1	382	1	1	0	1	0
16585	33.5	32.05	32.05	32.05	0	8	46	5.95	13.28		agonist	2.23193	13	2925	1022	10.6	16	14	4	4	2	0	2	0	128	1	1	39+4	1	1	0	1	0
45629	29	52	150	23.1111	0	4	55	6.78	15.2	0.37	agonist	2.24189	13	1575	1344	10.2	12	12	10	10	1	6	7	7	162	1	1	384	1	1	0	1	0
26949	27	69	168	24.4473	0	4	54	6.98	15.6933	0.73	agonist	2.24833	18	2487.5	4536	10.7	16	15	12	12	1	9	7	7	1198	1	1	385	1	1	0	1	0
24330	30	45	162	17.1468	1	2	31	9.58	21.68	0.42	agonist	2.26305	14	2400	2316	9	9	8	5	5	2	0	0	0	2	1	1	394	0	0	0	0	0
37493	39	47	156	19.313	0	2	29	8.64	19.6267		agonist	2.2716	11	2850	2506	10	11	8	5	5	1	2	2	2	490	1	1	395	1	1	0	1	0
41119	26	52	155	21.6441	0	2		9.02	20.52	0.31	agonist	2.27494	14	1450	3455	11.3	10	10	8	8	1	6	3	2	766	1	1	395	1	1	0	1	0
40891	27	72	164	26.7698	0	1	34	5.93	13.5067	0.39	agonist	2.27768	17	3150	2392	13.8	14	10	7	7	1	2	1	1	127	1	1	411	1	1	0	1	0
46210	28	65	163	24.4646	0	4	38	6.41	14.6933	0.45	agonist	2.29225	14	1925	3331	10.7	33	28	22	20	1	12	13	13	201	1	1	396	1	1	1	0	0
21440	28.5	24.03	24.03	24.03	0	6	48	4.67	10.7067		agonist	2.29265	9	1350	2224	10.9	7	7	4	4	2	1	1	1	132	1	0	0	0	0	0	0	0
43142	31	60	157	24.3418	0	2	43	7.82	17.9467	0.38	agonist	2.29497	16	2375	3546	11.8	26	15	12	12	1	5	1	1	452	1	1	310	1	1	0	1	0
39029	31	70	161	27.0051	0	6	47	4.84	11.1333	0.38	agonist	2.30028	11	1237.5	4636	12.5	20	20	16	16	1	4	8	8	227	1	1	393	1	1	1	0	0
44740	28	67	168	23.7387	1	1	48	6.19	14.2667	0.33	agonist	2.30479	11	1800	1916.2	12.2	7	5	3	3	1	1	2	1	611	1	1	375	1	1	0	1	0
17571	27.4	19.83	19.83	19.83	0	1	39	4.65	10.72		agonist	2.30538	12	1350	3599	10.3	13	13	9	9	2	6	6	4	483	2	2	37+3	1	2	2	0	0
25469	30	68	160	26.5625	0	5	35	3.8	8.78667	0.61	agonist	2.31228	19	3025	2033	12.9	12	9	6	5	2	1	0	0	2	0	0	0	0	0	0	0	0
21953	28	52	161	20.061	0	2	61	8.46	19.6667	0.58	agonist	2.32467	11	1350	649	13.1	6	6	3	3	2	0	2	0	1158	1	1	402	1	1	0	1	0
42375	25	61	153	26.0584	0	5		8.04	18.72	0.43	agonist	2.32836	12	2025	2365.5	15	14	14	11	10	1	6	3	3	130	1	1	390	1	1	1	0	0
22939	27	64	170	22.1453	0	3	32	7.55	17.72	0.46	agonist	2.34702	16	1875	1781	10	10	7	6	5	2	1	1	0	1389	2	2	374	1	2	1	1	0
44243	24	40	160	15.625	1	1	51	1.72	4.04	0.35	agonist	2.34884	14	1650	2255	10.1	11	11	9	9	1	3	5	5	284	1	1	395	1	1	1	0	0
46791	21	55	147	25.4524	1	2	52	7.1	16.6933	0.56	agonist	2.35117	13	2025	4618.4	10.8	11	10	7	7	1	5	4	4	507	1	1	422	1	1	1	0	0
23471	33	65	170	22.4913	1	3	67	8.42	19.9067	0.92	agonist	2.36421	12	1275	763	10.8	3	3	2	2	2	0	2	0	761	2	2	392	1	1	1	0	0
39805	28	55	165	20.202	1	5	42	6.54	15.6533	0.67	agonist	2.39348	14	1325	837	10.3	13	8	6	6	1	2	4	4	284	1	1	0	0	0	0	0	0
41280	36	70	162	26.6728	1	3		6.64	15.9867	0.3	agonist	2.40763	13	1687.5	1617	13.5	13	11	11	11	1	7	7	7	2	0	0	0	0	0	0	0	0
20954	30.1	20.7	20.7	20.7	1	3	67	6.94	16.8133		agonist	2.42267	15	2100	1018	7.2	5	4	4	4	2	0	3	1	948	1	1	38+2	1	1	1	0	0
48203	30	52	160	20.3125	1	2	50	7.12	17.2667	0.45	agonist	2.42509	15	1900	2118.9	14.7	7	7	6	6	1	4	3	3	368	1	1	390	1	1	1	0	0
22130	27	60	158	24.0346	1	3	46	5.62	13.68	0.88	agonist	2.43416	15	2062.5	3660	11.2	25	21	14	13	2	7	5	3	782	2	2	25+	0	0	0	0	0
17574	34.6	18.73	18.73	18.73	0	1	38	7.27	17.72		agonist	2.43741	12	1425	2481	11	11	11	9	8	2	7	8	4	804	2	2	24+0	0	0	0	0	0
18507	25.8	19.56	19.56	19.56	0	5	54	6.04	14.8		agonist	2.45033	13	1350	1372	15.6	6	6	6	6	2	1	4	0	335	1	1	39+4	1	1	1	0	0
9505	32.6	24.12	24.12	24.12	0	4	39	7.1	17.6		agonist	2.47887	15	2475	1817	11.9	11	8	4	4	2	1	1	0	2	0	0	0	0	0	0	0	0
21000	27.1	25.39	25.39	25.39	1	2	45	3.9	9.69333		agonist	2.48547	9	1013	1283	11.4	8	8	3	3	2	0	2	0	887	2	2	41+2	1	1	1	0	0
45596	37	60	155	24.974	1	9	41	7.78	19.4133	0.36	agonist	2.49529	11	1950	2335	10.5	11	11	10	9	1	2	2	1	2	0	0	0	0	0	0	0	0
18618	25.2	23.34	23.34	23.34	0	3	69	7.21	18		agonist	2.49653	13	1650	2688	11.6	8	7	6	6	2	4	3	0	2197	2	2	40+1	1	1	0	1	0
39050	28	60	157	24.3418	0	5	40	5.85	14.6133	0.5	agonist	2.49801	10	1800	2960	11	14	12	10	8	1	1	2	2	37038	1	1	384	1	1	1	0	0
17128	31.1	27.34	27.34	27.34	1	6	44	8.32	20.8		agonist	2.5	23	4350	1651	10.7	11	11	7	7	2	5	6	2	727	2	2	38+0	1	2	2	0	0
21930	28	52	155	21.6441	1	1	96	6.45	16.1333	0.83	agonist	2.50129	10	1200	4861	8.4	13	13	11	11	1	7	11	11	1674	1	1	411	1	1	0	1	0
46022	29	72	156	29.5858	0	3	36	8.82	22.0933	0.31	agonist	2.50491	17	4225	693.8	12	9	7	6	5	1	2	3	0	334	1	1	381	1	1	1	0	0
24205	30	58	163	21.83	1	1	38	3.03	7.6	0.56	agonist	2.50825	13	1725	1600	9.5	10	10	10	9	1	4	8	8	342	1	1	0	0	0	0	0	0
43140	23	56	148	25.5661	1	5	39	5.31	13.3467	0.2	agonist	2.5135	16	3525	2473	13.1	9	7	6	6	1	1	3	3	38	0	0	0	0	0	0	0	0
25283	23	52	165	19.1001	1	1	35	7	17.6667	0.57	agonist	2.52381	16	2475	466	9.4	2	2	2	2	2	0	2	0	1308	2	2	380	1	2	2	0	0
15176	27	17.63	17.63	17.63	0	1	38	13.1	33.0667		agonist	2.52417	26	6225	812	8	8	8	7	7	2	4	1	0	903	2	2	35+5	1	2	2	0	0
39088	30	65	160	25.3906	1	9		7.56	19.28	0.54	agonist	2.55026	10	1050	4300	10	29	28	18	18	1	12	10	10	67	1	0	0	0	0	0	0	0
20384	27	61	155	25.3902	0	5	44	6.88	17.5467	0.91	agonist	2.55039	14	1575	1265	11	21	19	15	14	2	5	9	9	555	1	1	392	1	1	1	0	0
42150	25	50	155	20.8117	1	1		3.73	9.57333	0.47	agonist	2.56658	11	1125	1656	12.7	18	18	16	15	1	4	4	4	187	1	1	396	1	1	1	0	0
22288	24	50	158	20.0288	0	1	63	6.42	16.5467	0.52	agonist	2.57736	9	900	1931	11.9	14	12	10	10	1	8	9	9	822	1	1	393	1	1	1	0	0
23979	34	59	161	22.7615	1	4	28	8.02	20.68	0.38	agonist	2.57855	13	2850	1710	8.8	5	4	4	4	2	2	2	0	1553	2	2	374	1	2	1	1	0
41051	27	62	161	23.9188	0	3	46	8.49	21.9067	0.41	agonist	2.58029	15	2100	1127	9.8	11	11	8	8	1	2	3	2	2	0	0	0	0	0	0	0	0
38717	30	50	163	18.8189	1	5		7.87	20.44	0.37	agonist	2.5972	14	2100	469	10	4	2	2	2	1	1	1	0	76	0	0	0	0	0	0	0	0
44112	30	42	150	18.6667	0	4	48	6.41	16.7333	0.46	agonist	2.6105	11	2300	2939.4	9.6	28	26	23	23	1	4	5	5	6	0	0	0	0	0	0	0	0
21054	34	21.37	21.37	21.37	0	6	59	7.95	20.8667		agonist	2.62474	13	2100	2190	15.8	18	11	7	7	1	11	5	5	2	0	0	0	0	0	0	0	0
18185	28.8	18.9	18.9	18.9	0	3	64	6.42	17.2		agonist	2.67913	13	1100	5256	13.7	15	14	10	10	2	4	3	0	925	1	1	40+3	1	1	1	0	0
22871	36	52	158	20.83	1	3	56	7.82	20.9733		agonist	2.68201	12	1425	3332	9.3	6	6	4	4	2	0	1	0	2	0	0	0	0	0	0	0	0
43549	26	59	165	21.6713	1	2	50	8.79	23.6933	0.81	agonist	2.69549	17	2212.5	1708	13.7	8	8	6	6	1	3	5	4	287	1	1	0	0	0	0	0	0
39543	27	60	162	22.8624	0	1		3.96	10.6933	0.42	agonist	2.70034	15	1800	4646	10.9	20	19	17	17	1	3	9	9	13	0	0	0	0	0	0	0	0
40526	28	56	163	21.0772	0	5	49	5.57	15.1067	0.28	agonist	2.71215	8	975	1739	11.9	12	10	9	9	1	6	2	2	414	1	1	402	1	1	0	1	0
39872	25	72	165	26.4463	1	2		3.73	10.1333	0.54	agonist	2.71671	18	2625	515	7.2	11	7	7	7	1	3	3	3	393	1	1	360	1	1	1	0	0
47526	25	71	160	27.7344	0	1	51	6.78	18.4267	0.25	agonist	2.7178	13	3000	1684.6	13.3	11	11	8	8	1	4	3	3	2	0	0	0	0	0	0	0	0
42274	32	65	162	24.7676	1	2	35	7.08	19.5467	0.34	agonist	2.76083	12	1350	1213	10.8	9	8	5	5	2	2	2	2	173	1	1	0	0	0	0	0	0
47994	29	52	160	20.3125	1	3	38	5.68	15.72	0.42	agonist	2.76761	13	1225	2823.3	8.8	10	8	6	5	1	1	2	2	227	1	1	390	1	1	1	0	0
37900	28	64	150	28.4444	0	3		5.53	15.4133	0.41	agonist	2.78722	14	2025	1440	9.8	11	8	7	7	1	2	1	1	2	0	0	0	0	0	0	0	0
47150	29	62	160	24.2188	1	2	49	9.1	25.8133	0.35	agonist	2.83663	11	2250	2353	10.9	22	21	19	19	1	7	5	5	154	1	1	0	0	0	0	0	0
24283	28	43	155	17.898	0	3	44	7.16	20.44	0.49	agonist	2.85475	12	2700	2282	10.7	10	9	8	8	1	6	4	4	3219	1	1	383	1	1	0	1	0
47296	28	59	162	22.4813	0	3		5.75	16.96	0.45	agonist	2.94957	9	1200	3309.1	9.5	11	10	6	6	1	4	3	3	385	1	1	385	1	1	1	0	0
42483	26	61	165	22.4059	0	4	44	4.98	14.7067	0.5	agonist	2.95315	10	1050	2219.8	8.4	9	8	7	7	1	3	6	6	2	0	0	0	0	0	0	0	0
17986	30.4	21.64	21.64	21.64	0	5	50	3.8	11.24		agonist	2.95789	11	1350	2792	11.3	9	8	5	5	1	2	4	2	334	1	1	40+5	1	1	0	1	0
42253	30	80	160	31.25	0	2	48	4.59	13.6		agonist	2.96296	12	2175	2497	10.2	17	16	9	6	1	0	1	1	55	1	1	25+	0	0	0	0	0
45535	28	72	165	26.4463	0	6	35	6.17	18.4	0.25	agonist	2.98217	13	1800	2012	16.7	14	10	8	7	1	3	2	2	49	0	0	0	0	0	0	0	0
20649	31.4	22.03	22.03	22.03	1	5	78	6.32	18.8933		agonist	2.98945	11	1725	1976	10	16	11	11	11	2	0	1	0	164	1	1	39	1	1	0	1	0
47032	27	57	158	22.8329	1	3		6.13	18.3733	0.38	agonist	2.99728	15	1700	2916.5	10.4	18	17	11	11	1	4	6	6	162	1	1	374	1	1	0	1	0
45914	30	70	160	27.3438	0	3	61	4.94	14.84	0.44	agonist	3.00405	10	1800	2144	8	14	8	7	6	1	2	3	3	199	1	1	371	1	1	0	1	0
45927	28	88	168	31.1791	0	2	45	6.42	19.4933	0.69	agonist	3.03634	10	2175	4835	11	38	31	28	25	1	13	3	3	494	1	1	392	1	1	1	0	0
23794	27	65	167	23.3067	0	1	70	7.08	21.52	0.97	agonist	3.03955	22	3000	3064	13.1	13	12	9	9	1	3	4	4	489	1	1	392	1	1	1	0	0
22552	25	67	155	27.8876	0	2	42	5.17	15.7333	0.84	agonist	3.0432	13	2100	2374	12.1	13	13	11	11	1	4	6	6	1923	1	1	381	1	1	1	0	0
39206	25	67	158	26.8386	1	6		4.1	12.5067	0.49	agonist	3.05041	12	2175	2797	10.2	21	19	15	15	1	4	2	2	2	0	0	0	0	0	0	0	0
41462	27	52	165	19.1001	0	4	60	9.29	28.6133	0.42	agonist	3.08001	12	2025	4422	13.5	23	23	20	20	1	8	6	5	377	1	1	395	1	1	1	0	1
24438	26	55	159	21.7555	0	2	63	6.88	21.4267	0.65	agonist	3.11434	9	1100	1183	13.8	3	3	2	2	2	0	1	0	1593	1	1	401	1	1	1	0	0
23183	31	47	160	18.3594	1	2	26	6.3	19.68	0.97	agonist	3.12381	12	1500	3186	9.8	7	7	6	6	2	4	6	4	852	1	1	393	1	1	1	0	0
22202	33	58	152	25.1039	1	7	30	7.37	23.1733	1	agonist	3.14428	10	2025	3903	10.8	9	7	6	6	2	4	2	1	2	0	0	0	0	0	0	0	0
37994	27	65	161	25.0762	1	6		9.16	28.9867	0.72	agonist	3.16448	11	1925	5099	7.8	20	10	7	6	1	2	2	2	1784	1	1	401	1	1	1	0	0
25990	40	82	158	32.8473	1	6	58	3.99	12.6667	0.7	agonist	3.1746	20	4312.5	1027	11.7	8	7	6	6	2	3	4	4	512	1	1	401	1	1	1	0	0
23209	27	42	155	17.4818	0	2	95	7.52	23.9333	0.72	agonist	3.18262	11	1600	3774	12.4	11	10	10	10	1	7	8	8	2	0	0	0	0	0	0	0	0
42067	28	44	158	17.6254	0	3	34	6.61	21.24		agonist	3.21331	15	1775	4291	9.4	11	11	9	8	1	3	5	5	578	1	1	383	1	1	1	0	0
24376	35	62	160	24.2188	1	3	48	5.41	17.5733	0.58	agonist	3.24831	12	1400	357	11.2	5	4	4	4	2	1	1	0	2	0	0	0	0	0	0	0	0
21289	24.3	25.54	25.54	25.54	0	4	49	5.7	18.7067		agonist	3.28187	15	2400	2808	9.8	22	20	10	10	1	5	3	3	90	0	0	0	0	0	0	0	0
46153	26	50	159	19.7777	0	1		8.39	27.68	0.43	agonist	3.29917	12	1175	5794	11.7	18	18	16	15	1	9	7	7	209	1	1	396	1	1	0	1	1
17542	29	50	156	20.5457	0	4	48	5.43	18	0.6	agonist	3.31492	8	900	5390	13	20	17	10	10	2	4	5	5	2	0	0	0	0	0	0	0	0
46191	26	56	156	23.0112	1	1	38	7.3	24.2667	0.8	agonist	3.3242	11	1650	4164	10.8	21	21	16	15	1	12	4	3	82	1	1	23+	0	0	0	0	1
21139	27.4	21.77	21.77	21.77	1	1	48	9.67	32.44		agonist	3.35471	10	1000	1955	15	11	11	10	10	2	5	5	3	1133	2	2	37+3	1	2	1	1	0
21133	36.6	21.77	21.77	21.77	1	15	38	6.41	21.52		agonist	3.35725	10	1350	1049	9	29	28	22	21	2	7	12	10	467	1	0	0	0	0	0	0	0
21534	27.5	22.91	22.91	22.91	1	4	39	5.68	19.16		agonist	3.37324	11	1325	91	11.6	21	21	17	17	2	2	11	11	2841	2	2	33+4	1	2	2	0	0
46178	29	47	155	19.563	0	7		4.07	13.7467	0.43	agonist	3.37756	10	1300	5103	11.7	23	21	15	15	1	2	2	2	2	0	0	0	0	0	0	0	0
23580	31	77	165	28.2828	1	6	51	5.16	17.9067	0.91	agonist	3.47028	8	1050	2768	10.2	18	17	15	15	1	12	13	13	19	0	0	0	0	0	0	0	0
22029	24	72	158	28.8415	0	1	65	4.64	16.28		agonist	3.50862	9	1125	1710	10.1	15	7	5	5	2	0	3	0	294	1	1	404	1	1	0	1	0
17761	26.6	19.05	19.05	19.05	1	3	54	5.89	21.0667		agonist	3.57668	10	988	4183	10.4	15	11	9	9	2	6	8	6	1110	1	1	38+5	1	1	1	0	0
39381	30	60	157	24.3418	0	3	37	4.99	17.9733	0.46	agonist	3.60187	16	1937.5	7343	10.7	28	27	25	25	1	22	5	5	204	1	1	391	1	1	1	0	0
47512	27	57	162	21.7193	0	2	34	6.99	25.4667	0.37	agonist	3.6433	15	2100	2752	12.5	22	20	16	15	1	8	4	3	663	1	1	394	1	1	0	1	0
39351	28	55	160	21.4844	1	1	44	7.06	25.92	0.45	agonist	3.67139	10	2025	2207	11.5	18	18	18	18	1	4	5	5	512	1	1	384	1	1	0	1	0
16651	29	23.44	23.44	23.44	0	2	51	6.89	25.8667		agonist	3.75423	14	1475	1144	12	5	2	1	1	2	0	0	0	2	0	0	0	0	0	0	0	0
22273	26	48	160	18.75	0	3	79	6.07	23.56	1.21	agonist	3.88138	14	1500	2131	7.3	17	16	12	12	1	4	7	5	220	1	1	353	1	1	1	0	0
42397	32	73	173	24.3911	0	2	49	1.85	7.2	0.26	agonist	3.89189	15	2175	286	9.5	6	2	2	2	2	0	2	0	167	2	2	372	1	2	2	0	0
16767	26.5	27.34	27.34	27.34	0	3	24	3.2	12.5333		agonist	3.91667	15	1788	1846	11	19	18	17	16	2	8	10	6	1	0	0	0	0	0	0	0	0
41331	25	62	160	24.2188	1	2		5.94	23.7867	0.37	agonist	4.00449	14	2250	2712.4	11.2	9	9	8	8	1	4	6	6	1	0	0	0	0	0	0	0	0
45847	31	50	157	20.2848	1	4	50	7.71	31.1467	0.32	agonist	4.03978	14	1837.5	2477	12.8	15	13	7	7	1	2	2	1	96	1	1	17+	0	0	0	0	0
16451	31	60	160	23.4375	0	13		6.1	25.0667	0.58	agonist	4.10929	10	1162.5	2476	13	13	12	9	8	1	2	1	1	2	0	0	0	0	0	0	0	0
23481	23	43	157	17.4449	1	1	78	13.78	56.7867	0.5	agonist	4.12095	13	1800	2096	8.8	14	13	7	7	1	5	5	5	1024	1	1	374	1	1	1	0	0
26324	28	57	163	21.4536	1	2	43	8.97	37	0.68	agonist	4.12486	12	1725		12	19	15	13	13	2	1	6	0	2	0	0	0	0	0	0	0	0
25921	26	48	160	18.75	1	1	56	7.03	29.2	0.82	agonist	4.15363	10	1275	2421	9.3	16	15	13	13	1	5	5	4	436	1	1	393	1	1	1	0	0
24662	29	44	158	17.6254	1	2	49	6.89	28.68	0.65	agonist	4.16255	13	1475	4544	10.2	17	16	12	12	1	8	4	4	1928	1	1	394	1	1	1	0	1
22842	32	63	169	22.0581	1	2	71	4.42	18.5733	0.66	agonist	4.20211	11	1125	1520	6.2	11	9	6	6	2	4	4	4	2	0	0	0	0	0	0	0	0
45988	40	55	162	20.9572	0	2	55	6.61	28.4	0.52	agonist	4.29652	9	1200	4690	9.2	15	13	6	6	1	2	2	2	2	0	0	0	0	0	0	0	0
26693	28	62	165	22.7732	1	4	61	7.87	34.9333		agonist	4.4388	13	1800	5169	11.9	16	14	12	12	1	3	3	3	2	0	0	0	0	0	0	0	0
41845	29	65	168	23.03	0	3		5.9	27.6267	0.46	agonist	4.68249	15	2150	2526	18.6	29	23	14	14	1	9	7	7	2	0	0	0	0	0	0	0	0
18218	37	59	153	25.204	1	3	60	5.39	25.84		agonist	4.79406	13	2025	2711	11.4	10	9	7	6	1	0	2	2	455	1	1	366	1	1	1	0	0
41798	29	45	156	18.4911	0	2	29	4.51	22.3867	0.46	agonist	4.96378	12	1062.8	3567	10.2	13	11	7	6	1	0	0	0	2	0	0	0	0	0	0	0	0
47417	29	54	158	21.6311	0	8		12.1	62.1467	0.37	agonist	5.13609	18	2475	2197	10.8	12	9	7	7	1	4	2	2	61	0	0	0	0	0	0	0	0
37782	32	55	159	21.7555	1	5		13.4	69.9467		agonist	5.2199	12	1725	2237	12	12	11	9	9	1	5	1	1	583	1	1	404	1	1	0	1	0
40322	24	60	163	22.5827	0	2	33	6.64	35.2933	0.37	agonist	5.31526	12	1100	2942	11.1	27	24	21	21	1	10	7	7	222	1	1	394	1	1	0	1	0
24472	31	55	152	23.8054	1	1	29	5.61	31.0667	0.7	agonist	5.53773	16	1987.5	4207	13.5	10	9	3	3	1	2	1	1	161	0	0	0	1	0	0	0	0
41261	28	47	162	17.9089	0	3	54	5.33	30.52	0.35	agonist	5.72608	14	1200	2918	10	16	16	13	13	1	4	3	3	42	0	0	0	0	0	0	0	0
43673	23	70	148	31.9576	1	3		1.6	9.82667	0.28	agonist	6.14167	16	3750	2011.2	11.8	11	9	4	4	1	0	0	0	203	1	1	0	0	0	0	0	0
44627	32	58	160	22.6562	1	4	42	6.53	40.16	0.51	agonist	6.15008	16	2550	2352.2	11.8	17	13	8	8	1	5	4	4	97	1	1	391	1	1	1	0	0
24169	25	65	160	25.3906	0	4	33	4.82	31.6	0.67	agonist	6.55602	13	2025	654	8.8	7	7	7	7	1	4	6	6	393	1	1	395	1	1	1	0	0
38762	31	53	165	19.4674	1	1	36	5.67	38.0933	0.31	agonist	6.7184	9	900	1348	13.3	13	10	8	8	1	0	1	1	2	0	0	0	0	0	0	0	0
44814	27	60	165	22.0386	0	2	36	5.11	40.44	0.24	agonist	7.91389	10	1175	2558	9.8	26	20	15	15	1	9	6	6	2	0	0	0	0	0	0	0	0
43468	30	72	158	28.8415	1	3	28	5.65	49.7733		agonist	8.80944	15	2475	1937	10.4	7	7	5	5	2	2	1	0	390	2	2	365	1	2	1	1	0
16917	27.6	32.05	32.05	32.05	1	3	74	2.13	18.8667		agonist	8.85759	15	2438	3206	10.5	21	19	17	16	2	6	7	5	2	0	0	0	0	0	0	0	0
20141	31	55	153	23.4952	0	6	22	3.35	0.0933333		mild stimulation	0.0278607	16	2925	188	8.4	10	10	4	4	2	0	0	0	2	0	1	353	0	0	0	0	0
17425	29	65	157	26.3702	0	4	29	1.85	0.0933333	0.2	mild stimulation	0.0504505	14	2400	319	10.3	2	2	2	2	2	0	0	0	2	0	0	0	0	0	0	0	0
18075	27	50	162	19.052	0	3	46	2.64	0.373333	0.43	mild stimulation	0.141414	9	1200	619	13.8	13	11	9	8	2	2	2	1	715	1	1	401	1	1	0	1	0
18045	27	65	160	25.3906	0	2	24.65	5.75	0.973333	0.39	mild stimulation	0.169275	15	2775	530	11	6	6	4	3	2	0	1	0	1	0	0	0	0	0	0	0	0
16673	29	49	158	19.6283	0	6	47	1.18	0.213333	0.22	mild stimulation	0.180791	18	2550	3011	11.7	10	10	7	7	2	1	3	1	2	0	0	0	0	0	0	0	0
24054	22	57	160	22.2656	0	2	24	9.65	2.18667	0.45	mild stimulation	0.226598	11	1650	1040	9.1	12	12	10	10	2	2	3	3	173	1	1	393	1	1	0	1	0
37361	25	69	167	24.7409	0	2		3.41	0.973333		mild stimulation	0.285435	14	1875	532	12	3	3	3	3	2	0	2	0	647	2	2	355	1	2	1	1	0
21895	31	75	165	27.5482	1	10	32.5	10.73	3.38667		mild stimulation	0.315626	14	2475	125	9.2	1	1	1	1	1	0	0	0	2	0	0	0	0	0	0	0	0
13758	34	62	162	23.6244	1	1	43.59	4.71	1.65333	0.42	mild stimulation	0.351026	10	1200	2035	16.8	14	13	12	12	2	7	7	3	360	1	1	0	0	0	0	0	0
16651	29	58	160	22.6562	0	2	34	7.83	3.02667	0.41	mild stimulation	0.386547	8	1050	1818	15	11	7	7	6	2	2	4	0	135	1	1	0	0	0	0	0	0
43418	26	51	158	20.4294	1	1		5.73	2.38667	0.43	mild stimulation	0.416521	9	1200	2641.9	9.8	21	17	14	14	1	9	7	7	2	0	0	0	0	0	0	0	0
35712	26	65	150	28.8889	0	5		8.59	3.77333	0.15	mild stimulation	0.43927	10	1625	206.6	9.8	19	17	9	9	1	5	7	6	370	1	1	393	1	1	0	1	0
13352	30	62	158	24.8358	1	1	34	4.71	2.17333		mild stimulation	0.46143	9	1200	984	8.4	23	16	12	12	1	2	4	0	2109	1	1	0	0	0	0	0	0
40309	24	68	155	28.3039	1	4		5.16	2.41333	0.4	mild stimulation	0.4677	11	2325	1469.5	13.7	12	9	9	9	1	6	5	3	346	1	1	354	1	1	1	0	0
42123	30	72	161	27.7767	1	4		7.38	3.6		mild stimulation	0.487805	10	1425	955.7	12.6	6	5	2	2	1	0	0	0	428	1	1	394	1	1	0	1	0
20294	35	65	175	21.2245	0	4	52	6.09	3.13333	0.66	mild stimulation	0.514505	11	750	394	9	6	5	5	5	2	2	3	1	398	1	1	413	1	1	1	0	0
26544	30	76	168	26.9274	0	1	40	6.61	3.81333	0.58	mild stimulation	0.576904	10	1575	2875	14	7	7	5	5	2	1	4	0	325	1	1	376	1	1	0	1	0
16978	31	77	170	26.6436	1	4		3.24	1.90667	0.37	mild stimulation	0.588477	13	2100	720	9	15	10	9	9	1	3	3	1	258	1	1	382	1	1	0	1	0
18247	24	63	159	24.9199	1	2	37	3.44	2.09333	0.43	mild stimulation	0.608527	11	1425	2681	9.9	22	15	10	10	1	4	4	4	5	0	0	0	0	0	0	0	0
14158	36	68	162	25.9107	1	10	33	5.43	3.4		mild stimulation	0.626151	18	4200	596	10	4	3	3	3	2	0	1	0	2	0	0	0	0	0	0	0	0
21006	27	57	161	21.9899	1	1	35	7.05	4.78667	0.44	mild stimulation	0.67896	7	750	2347	11.2	10	7	5	5	2	0	3	0	569	1	1	390	1	1	0	1	0
18354	40	52	155	21.6441	1	2	77	2.54	1.73333	0.2	mild stimulation	0.682415	10	1650	115	9	5	5	5	5	2	2	4	0	7	0	0	0	0	0	0	0	0
10323	31	65	150	28.8889	0	8	22	5.06	3.66667	0.33	mild stimulation	0.724638	14	1950	330	7	4	4	4	3	2	0	2	0	2	0	0	0	0	0	0	0	0
35434	26	58	150	25.7778	1	1		4.45	3.38667	0.43	mild stimulation	0.761049	10	975	4808.7	6.9	7	6	4	4	1	1	4	4	2	0	0	0	0	0	0	0	0
42802	32	78	158	31.245	0	5		9.31	7.36	0.21	mild stimulation	0.790548	12	3300	4118.4	6.9	16	11	11	11	1	2	5	1	131	1	2	372	1	2	2	0	0
24881	27	60	163	22.5827	0	2	34	9.14	7.48	0.45	mild stimulation	0.818381	14	1850	2472	11.2	7	7	7	7	2	2	2	0	2	0	0	0	0	0	0	0	0
21905	31	54	153	23.0681	1	1	37	6.3	5.26667	0.58	mild stimulation	0.835979	12	2175	2720	9.1	14	12	9	9	2	4	1	0	234	1	1	396	1	1	1	0	0
45697	30	60	164	22.3081	0	1		6.24	5.22667	0.18	mild stimulation	0.837607	10	1500	2021.6	10.2	15	13	6	6	2	1	1	0	2	0	0	0	0	0	0	0	0
20330	33	78	163	29.3575	1	11	40	5.89	5.29333	0.39	mild stimulation	0.898698	8	1050	474	10	16	14	12	12	2	9	9	7	522	1	1	380	1	1	0	1	0
17429	29	72	160	28.125	0	10	62	5.95	5.4	0.86	mild stimulation	0.907563	10	1425	288	9.5	6	5	4	4	2	2	2	0	2	0	0	0	0	0	0	0	0
17691	34	55	162	20.9572	1	2	57	4.55	4.13333	0.53	mild stimulation	0.908425	9	1200	2025	12.2	20	18	10	10	2	3	4	0	248	2	2	22+	0	0	0	0	0
44972	25	67	163	25.2174	0	3		5.31	5.05333	0.37	mild stimulation	0.951664	12	2200	2688	10.1	25	25	21	21	1	4	2	1	149	1	1	400	1	1	1	0	0
38095	33	48	156	19.7239	0	1		4.87	4.73333		mild stimulation	0.971937	8	1200	2899	8.1	11	11	9	8	1	2	1	1	1000	1	1	386	1	1	0	1	0
14102	31	54	158	21.6311	1	2	35	5.3	5.24	0.42	mild stimulation	0.988679	10	1500	854	13.1	24	24	22	21	2	2	0	0	2	0	0	0	0	0	0	0	0
46127	24	40	155	16.6493	0	1		8.49	8.4		mild stimulation	0.989399	10	1200	2889	7	15	8	8	8	1	4	5	5	2	0	0	0	0	0	0	0	0
21489	26	62	162	23.6244	1	3	54.74	7.64	7.68	0.67	mild stimulation	1.00524	11	1200	127	10.3	19	17	6	4	2	2	2	0	388	1	1	352	1	2	0	2	0
26783	40	55	160	21.4844	1	10	69	5.19	5.33333	0.38	mild stimulation	1.02762	9	1350	2934	8.7	9	8	8	8	1	4	4	4	267	1	0	0	0	0	0	0	0
20856	26	85	160	33.2031	0	4	50	5.72	6.02667	0.45	mild stimulation	1.05361	13	1275	542	11.1	5	5	4	4	2	0	1	0	2	0	0	0	0	0	0	0	0
39082	30	55	160	21.4844	1	3		9.85	10.4	0.27	mild stimulation	1.05584	10	1350	2688	8.6	9	8	5	5	1	2	3	2	447	1	1	0	0	0	0	0	0
17590	32	65	162	24.7676	0	7	35.1	4.37	4.74667	0.2	mild stimulation	1.08619	10	1350	2947	13.4	9	9	9	9	2	6	7	5	302	2	1	396	1	1	1	0	0
19195	27	67	158	26.8386	1	2	40	4.53	4.96		mild stimulation	1.09492	15	1500	5093	10	16	16	14	14	1	6	5	3	222	1	1	380	1	1	0	1	0
17368	30	60	156	24.6548	0	2	60.2	5.78	6.34667	0.28	mild stimulation	1.09804	15	1950	1151	12.3	9	6	6	6	2	1	1	0	129	2	2	295	1	2	1	1	0
16872	29	66	159	26.1066	1	1	44.15	3.72	4.09333	1.22	mild stimulation	1.10036	9	1125	679	8.2	7	5	3	3	2	0	1	0	221	2	2	363	1	2	1	1	0
24951	31	61	162	23.2434	0	5	38	6.49	7.14667	0.82	mild stimulation	1.10118	8	787.5	1067	11	1	1	1	1	1	0	1	0	2	0	0	0	0	0	0	0	0
20833	30	40	157	16.2278	1	1	47	6.74	7.86667	0.28	mild stimulation	1.16716	9	750	459	8.5	8	6	3	3	2	0	2	0	989	1	1	401	1	1	0	1	0
19097	29	64	165	23.5078	1	5	36	5.92	7.05333	0.7	mild stimulation	1.19144	10	1350	229	8	14	11	11	11	1	1	1	0	208	2	2	41+1	1	1	0	1	0
38771	27	44	155	18.3143	1	3		6.09	7.58667	0.3	mild stimulation	1.24576	9	862.5	4932.65	13.7	13	9	9	9	1	8	4	4	2	0	0	0	0	0	0	0	0
19131	28	50	160	19.5312	0	3	35.53	7.58	9.52	0.41	mild stimulation	1.25594	9	1125	1707	9.9	14	14	12	12	2	6	4	2	228	1	1	396	1	1	1	0	0
21180	35	60	155	24.974	1	8	22	6.47	8.29333	0.26	mild stimulation	1.28181	10	1650	335	8	4	4	4	4	2	1	4	2	666	1	1	394	1	1	0	1	0
24806	30	67	159	26.5021	1	5	38	4.61	5.96		mild stimulation	1.29284	9	1200	2422	10.4	13	11	8	8	1	4	6	6	50	0	0	0	0	0	0	0	0
18881	32	61	158	24.4352	0	8	56	6.55	8.54667	0.54	mild stimulation	1.30483	11	2400	3141	8.5	13	6	3	3	1	0	1	0	7	0	0	0	0	0	0	0	0
21565	25	82	160	32.0312	1	1	31	10.11	13.2667		mild stimulation	1.31223	22	4950	1429	10.1	12	11	9	9	2	2	3	1	4	0	0	0	0	0	0	0	0
15631	32	60	150	26.6667	1	9	49.6	5.5	7.34667	0.4	mild stimulation	1.33576	18	2812.5	2966	12.3	12	10	4	4	2	1	2	0	2	0	0	0	0	0	0	0	0
42079	24	58	150	25.7778	0	4		8.76	12.04		mild stimulation	1.37443	9	1125	3881	9.3	20	16	13	11	1	4	6	6	2	0	0	0	0	0	0	0	0
40722	33	80	163	30.1103	1	6		4.62	6.37333	0.35	mild stimulation	1.37951	12	1800	2865	8.8	23	13	10	10	1	6	7	4	493	1	1	394	1	1	1	0	0
9071	41	68	161	26.2336	1	1	31	5.82	8.52	0.81	mild stimulation	1.46392	19	2925	1675	9.8	5	2	2	2	2	0	2	0	5	0	0	0	0	0	0	0	0
20720	30	48	158	19.2277	0	2	50.95	6.33	9.26667		mild stimulation	1.46393	7	450	1653	10.2	5	4	3	3	2	0	2	0	364	1	1	410	1	1	1	0	0
19235	27	50	156	20.5457	0	1	12	2.69	4.05333	0.31	mild stimulation	1.50682	11	1275	5423	8.9	26	26	22	22	1	10	16	14	1391	1	1	390	1	1	1	0	0
39059	31	90	160	35.1562	0	11		9.31	14.04		mild stimulation	1.50806	21	5137.5	2400.1	12.8	8	7	5	5	1	0	3	1	519	1	1	406	1	1	0	1	0
39508	32	53	155	22.0604	0	1		5.1	7.84		mild stimulation	1.53725	10	975	4229.8	9.6	12	10	7	6	1	4	6	4	176	1	1	383	1	1	1	0	0
40023	32	57	165	20.9366	0	3		6.76	10.4933	0.26	mild stimulation	1.55227	10	1050	2157	9	6	4	4	4	1	2	3	2	19	0	0	0	0	0	0	0	0
45561	31	56	155	23.3091	1	3		4.3	6.82667	0.3	mild stimulation	1.5876	12	1425	1794	12.2	15	13	9	9	1	6	2	1	544	1	1	0	0	0	0	0	0
22429	35	65	164	24.1672	1	7	22	4.1	6.62667	0.49	mild stimulation	1.61626	12	1800	1013	12.5	2	2	2	2	2	0	1	0	230	1	1	393	1	1	0	1	0
20321	33	52	162	19.8141	0	1	40	5.48	9	0.64	mild stimulation	1.64234	8	525	571	9.3	8	3	3	3	2	0	2	0	204	1	1	406	1	1	1	0	0
45560	27	48	158	19.2277	0	1		7.76	12.7467	0.25	mild stimulation	1.64261	12	1500	4474.4	12.3	45	42	37	37	1	11	9	4	33	1	1	400	1	1	1	0	0
37454	30	66	158	26.4381	0	7		5.98	10.3333	0.65	mild stimulation	1.72798	14	2475	249.48	9.2	6	6	4	4	1	2	3	1	114	1	1	382	1	1	0	1	0
25307	28	55	163	20.7008	1	2		6.01	10.5467		mild stimulation	1.75485	10	975	3532	15.5	11	11	8	8	1	4	5	3	114	1	0	0	0	0	0	0	0
14728	33	57	160	22.2656	1	1	38	6.63	11.76	0.51	mild stimulation	1.77376	10	1200	4136	10.8	15	13	12	11	2	7	7	4	256	2	1	382	1	1	1	0	0
34239	26	57	150	25.3333	0	6		6.7	11.9067		mild stimulation	1.77711	11	1200	1036	8.5	5	3	3	3	1	0	2	0	2	0	0	0	0	0	0	0	0
42425	28	45	162	17.1468	0	3		8.23	15.48	0.25	mild stimulation	1.88092	9	900	4951.3	9.9	23	19	14	14	1	5	1	2	2524	1	1	401	1	1	1	0	1
19003	28	46	160	17.9688	0	2	77	5.86	11.3867		mild stimulation	1.94312	8	825	1810	10	21	20	15	15	2	10	9	5	1	0	0	0	0	0	0	0	0
16228	30	49	159	19.3821	1	2	49	7.97	15.68	0.56	mild stimulation	1.96738	7	900	1093	9.4	12	10	10	10	1	3	4	2	4	0	0	0	0	0	0	0	0
46845	27	80	165	29.3848	0	4	40	4.78	9.56	0.65	mild stimulation	2	12	1675	418.1	9.9	9	7	1	1	1	0	0	0	2	0	0	0	0	0	0	0	0
38704	32	65	159	25.711	1	1		7.58	15.2	0.5	mild stimulation	2.00528	14	3350	2012.9	13.2	19	14	5	5	1	2	2	0	2	0	0	0	0	0	0	0	0
17999	24	48	155	19.9792	1	3	48	5.06	10.3067	0.2	mild stimulation	2.03689	9	750	4385	12.5	14	14	9	9	2	4	6	4	895	1	1	412	1	1	0	1	0
45694	27	54	160	21.0938	1	4		7.63	15.7867	0.34	mild stimulation	2.06903	9	900	4846.3	13	21	17	17	17	1	8	9	3	11	0	0	0	0	0	0	0	0
15262	29	62	159	24.5243	0	4	43	5.72	11.9867	0.2	mild stimulation	2.09557	10	1350	2675	10.8	7	6	6	6	2	3	5	1	702	2	2	376	1	2	1	1	0
40348	38	55	158	22.0317	1	5	37	4.84	10.2933	0.4	mild stimulation	2.12672	9	1275	2358	9.4	16	16	14	14	1	4	6	1	1	0	0	0	0	0	0	0	0
38084	29	52	160	20.3125	0	6		6.85	14.8267	0.46	mild stimulation	2.16448	15	2175	2452	11.4	9	9	7	7	2	1	0	0	359	2	2	372	1	2	1	1	0
18672	26	59	155	24.5578	0	1	73.5	2.98	6.48	0.71	mild stimulation	2.1745	12	1325	3399	9.6	12	10	9	9	2	4	5	2	363	1	1	406	1	1	1	0	0
37910	28	66	164	24.539	1	1	31	3.03	7.34667	0.25	mild stimulation	2.42464	16	3000	1797	10.3	15	9	8	7	1	4	4	3	1003	1	1	384	1	1	1	0	0
9505	32	55	151	24.1217	1	4	37.6	7.1	17.6	0.62	mild stimulation	2.47887	11	1500	2620	9.7	11	10	10	10	2	8	3	1	2154	2	2	19+	0	0	0	0	0
18604	33	67	158	26.8386	1	1	61.4	3.84	10.0533	0.48	mild stimulation	2.61806	29	3225	1224	8.4	15	15	13	13	2	11	12	8	346	2	1	356	1	1	1	0	0
47294	21	42	150	18.6667	0	2		9.9	27.8267		mild stimulation	2.81077	10	1050	3009	10.8	8	6	4	4	1	0	0	0	11	0	0	0	0	0	0	0	0
39967	26	57	155	23.7253	1	1	29	6.47	18.2133	0.46	mild stimulation	2.81504	8	1125	2010.6	10	17	16	11	11	1	8	4	3	2	0	0	0	0	0	0	0	0
19366	24	60	168	21.2585	1	2	41	6.24	17.8133		mild stimulation	2.8547	9	900	4308	10.3	17	14	12	12	1	5	2	2	1864	1	1	0	0	0	0	0	0
38097	26	75	165	27.5482	0	1		4.95	14.2667	0.89	mild stimulation	2.88215	10	1500	2239.99	11.8	13	13	11	11	2	4	4	0	1	0	0	0	0	0	0	0	0
19376	28	49	158	19.6283	0	4	38	5.74	16.6133		mild stimulation	2.89431	8	1050	2931	11.3	22	19	15	14	1	6	8	6	545	1	1	394	1	1	1	0	0
38996	30	60	160	23.4375	1	4	33	4.03	11.7067	0.7	mild stimulation	2.90488	10	1150	662.4	11.9	8	7	3	3	1	0	0	0	10	0	0	0	0	0	0	0	0
42941	27	67	160	26.1719	0	2	39	7.75	23.6667	0.85	mild stimulation	3.05376	15	2162.5	1985.1	10.8	5	4	4	4	1	2	1	0	349	2	2	373	1	2	1	1	0
25791	30	70	160	27.3438	0	5	45.45	2.73	8.48	0.58	mild stimulation	3.10623	15	2400	1131	8.9	10	9	7	7	1	3	3	3	2	0	0	0	0	0	0	0	0
20041	24	70	160	27.3438	0	2	39	3.68	12.8533		mild stimulation	3.49275	12	1350	300	7	6	6	6	6	2	2	3	0	452	2	2	364	1	2	1	1	0
37126	24	53	160	20.7031	0	3		5.11	18.08	0.63	mild stimulation	3.53816	17	2887.5	1281	12.3	9	8	8	8	2	2	5	2	87	0	0	0	0	0	0	0	0
25407	26	55	155	22.8928	0	2	53	5.71	21.08	0.41	mild stimulation	3.69177	8	787.5	5532	10.3	19	17	16	16	1	7	11	11	2	0	0	0	0	0	0	0	0
42469	29	42	155	17.4818	0	2	38	6.5	25.8667	0.57	mild stimulation	3.97949	8	975	1853.2	9	18	12	9	9	1	3	2	1	240	1	1	376	1	1	0	1	0
